# Supplementary material
Source: PubMed Central journal article supplement (PMC6969498)
Supplement: pnas.1910787117.sapp.pdf [file pnas.1910787117.sapp.pdf]

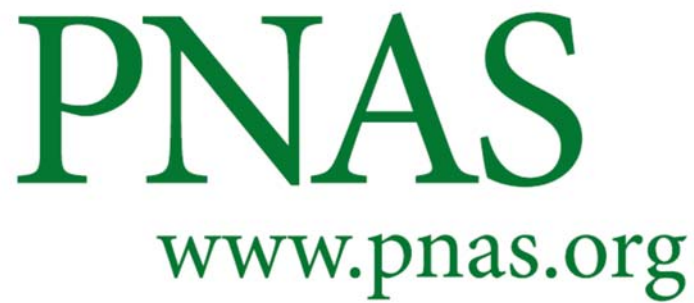

## **Supplementary Information for**

Rescue of Tomato spotted wilt virus entirely from cDNA clones; establishment of the first reverse genetics system for a segmented (-)RNA plant virus

Mingfeng Feng<sup>a</sup>, Ruixiang Cheng<sup>a</sup>, Minglong Chen<sup>a</sup>, Rong Guo<sup>a</sup>, Luyao Li<sup>a</sup>, Zhike Feng<sup>a</sup>, Jianyan Wu<sup>a</sup>, Li Xie<sup>b</sup>, Jian Hong<sup>b</sup>, Zhongkai Zhang<sup>c</sup>, Richard Kormelink<sup>d</sup> and Xiaorong Tao<sup>a,1</sup>

Corresponding Author: Xiaorong Tao

Email: [taoxiaorong@njau.edu.cn](mailto:taoxiaorong@njau.edu.cn)

### **This PDF file includes:**

Supplementary Materials and Methods

Figs. S1 to S9

Tables S1 to S3

References for SI reference citations

## Supplementary Materials and Methods

### Plasmid construction

**Construction of RdRp, RdRp<sub>opt</sub>, N, NSs and VSRs.** The cDNA of the RdRp, N, and NSs genes was amplified from the total RNA of *N. benthamiana* leaves infected with TSWV lettuce isolate, then inserted into binary vector pCambia2300 or pCXSN to generate p2300-RdRp<sub>wt</sub>, p2300-N, and pCXSN-NSs downstream of a double 35S promoter (2×35S). The pCB301-P19-HcPro-γb construct expressing three VSRs P19, HcPro and γb simultaneously was kindly provided by Dr. Xianbing Wang in College of Biological Sciences of China Agricultural University (1). The codon usage and intron-splicing sites of RdRp were optimized (*SI Appendix, Fig. S9*) and *de novo* synthesized by GenScript Biotech Corp (Nanjing, China), then inserted into binary vector pCambia2300 to generate p2300-RdRp<sub>opt</sub> downstream of the 2×35S promoter.

**Construction of full-length TSWV genomic S<sub>(-)</sub>, M<sub>(-)</sub>, L<sub>(-)</sub>, and antigenomic S<sub>(+)</sub>, M<sub>(+)</sub> and L<sub>(+)</sub> cDNA clones.** To generate constructs to express full-length TSWV genomic and antigenomic RNA of S, M and L segments, total RNA extracted from TSWV-lettuce infected leaves of *N. benthamiana* plants was reverse transcribed into cDNA, followed by PCR amplification with specific primers (*SI Appendix, Table S3*) using Phanta Super-Fidelity DNA Polymerase (Vazyme Biotech, Nanjing, China). The PCR products were fused with self-cleaving hammerhead (HH) ribozyme (2) and inserted into binary expression vector pCB301-2×35S-RZ-NOS linearized by two restriction endonucleases StuI and SmaI (3). cDNA clones of pCB301-2×35S-HH-S<sub>(-)</sub>-RZ-NOS [S<sub>(-)</sub>], pCB301-2×35S-HH-M<sub>(-)</sub>-RZ-NOS [M<sub>(-)</sub>], pCB301-2×35S-HH-L<sub>(-)</sub>-RZ-NOS

[L<sub>(-)</sub>], pCB301- pCB301-2×35S-HH-S<sub>(+)</sub>-RZ-NOS [S<sub>(+)</sub>], 2×35S-HH-M<sub>(+)</sub>-RZ-NOS [M<sub>(+)</sub>] and pCB301-2×35S-HH-L<sub>(+)</sub>-RZ-NOS [L<sub>(+)</sub>] were then generated. The full-length TSWV genomic RNA of S<sub>(-)</sub>, M<sub>(-)</sub> and L<sub>(-)</sub>, and antigenomic RNA of S<sub>(+)</sub>, M<sub>(+)</sub> and L<sub>(+)</sub> were expressed downstream of the double 35S promoter (2×35S) and flanked with a self-cleaving hammerhead (HH) ribozyme at the 5'-terminus and a hepatitis delta virus (HDV) ribozyme at the 3'-terminus.

**Construction of TSWV SR<sub>(-)eGFP</sub>, SR<sub>(-)mCherry&eGFP</sub> and SR<sub>(+)eGFP</sub> mini-replicons.** For generating SR<sub>(-)eGFP</sub>-genomic RNA mini-replicon, the eGFP ORF was amplified and used to replace the N gene in the pCB301-2×35S-HH-S<sub>(-)</sub>-RZ-NOS by *in vitro* recombination using the In-Fusion Cloning mixture (Clontech, Japan). The construct pCB301-2×35S-HH-SR<sub>(-)eGFP</sub>-RZ-NOS [SR<sub>(-)eGFP</sub>] was generated.

For generating SR<sub>(-)mCherry&eGFP</sub> in which the NSs and N genes in S gRNA were replaced with mCherry and eGFP, respectively, the mCherry ORF was amplified and used to exchange the NSs gene in the pCB301-2×35S-HH-SR<sub>(-)eGFP</sub>-RZ-NOS by recombination using the In-Fusion Cloning mixture (Clontech). The construct pCB301-2×35S-HH-SR<sub>(-)mCherry&eGFP</sub>-RZ-NOS [35S:SR<sub>(-)mCherry&eGFP</sub>] was generated. The T7:SR<sub>(-)mCherry&eGFP</sub> mini-replicon (pCB301-T7-HH-SR<sub>(-)mCherry&eGFP</sub>-RZ-NOS) controlled by T7 promoter was constructed by the same strategy as 35S:SR<sub>(-)mCherry&eGFP</sub>.

For generating antigenomic S<sub>(+)eGFP</sub>-mini-replicon, the eGFP ORF was amplified and used to replace the NSs gene in the pCB301-2×35S-HH-S<sub>(-)</sub>-RZ-NOS by recombination using the In-Fusion Cloning mixture (Clontech). The construct pCB301-2×35S-HH-SR<sub>(+)eGFP</sub>-RZ-NOS [SR<sub>(+)eGFP</sub>] was generated. The primers used above are

listed in [SI Appendix, Table S3](#).

**Construction of TSWV MR<sub>(-)eGFP</sub>, MR<sub>(-)mCherry</sub> and MR<sub>(-)eGFP&NSmMut</sub> mini-replicons.**

For generating MR<sub>(-)eGFP</sub> and MR<sub>(-)mCherry</sub> mini-replicons, the eGFP and mCherry ORFs were amplified and used to replace the GP gene in pCB3012×35S-HH-M<sub>(-)</sub>-RZ-NOS, respectively, by recombination using the In-Fusion Cloning mixture (Clontech). The constructs pCB301-2×35S-HH-MR<sub>(-)eGFP</sub>-RZ-NOS [MR<sub>(-)eGFP</sub>] and pCB301-2×35S-HH-MR<sub>(-)mCherry</sub>-RZ-NOS [MR<sub>(-)mCherry</sub>] were generated.

For generating MR<sub>(-)eGFP&NSmMut</sub> in which a stop codon was introduced immediately after the start codon of NSm, the NSm<sup>Mut</sup> was amplified and used to replace the wild-type NSm sequence in pCB301-2×35S-HH-MR<sub>(-)eGFP</sub>-RZ-NOS by recombination using the In-Fusion Cloning mixture (Clontech). The construct pCB301-2×35S-HH-MR<sub>(-)eGFP&NSmMut</sub>-RZ-NOS [MR<sub>(-)eGFP&NSmMut</sub>] was generated. All primers used above are listed in [SI Appendix, Table S3](#).

**Construction of full-length L<sub>(+)opt</sub> and M<sub>(-)opt</sub> cDNA clones.** For generating the full-length L<sub>(+)opt</sub> cDNA clone, RdRp with the sequence codon and intron-splicing sites optimized was amplified and used to replace the wild-type RdRp sequence in pCB301-2×35S-HH-L<sub>(+)</sub>-RZ-NOS by recombination using the In-Fusion Cloning mixture (Clontech). The construct pCB301-2×35S-HH-L<sub>(-)opt</sub>-RZ-NOS [L<sub>(-)opt</sub>] was generated.

To generate the full-length M<sub>(-)opt</sub> cDNA clone, the GP gene with codon and intron-splicing sites optimized was *de novo* synthesized by GenScript Biotech Corp (Nanjing, China) ([SI Appendix, Fig. S10](#)) and used to replace the wild-type GP sequence in pCB301-2×35S-HH-M<sub>(-)</sub>-RZ-NOS by *in vitro* recombination using the In-Fusion

Cloning mixture (Clontech). The construct pCB301-2×35S-HH-M<sub>(-)</sub>opt-RZ-NOS [M<sub>(-)</sub>opt] was generated. The primers used above are listed in [SI Appendix, Table S3](#).

### **Plant material and virus source**

Six to 8-week-old plants of *Nicotiana benthamiana*, were used in all agroinfiltration assays. The TSWV isolate from asparagus lettuce (TSWV-LE) was used in this study (GenBank accession KU976396 for S, JN664253 for M and KU976394 for L) (4). The TSWV-LE isolate was maintained in *N. benthamiana*. For long-term storage, infected new leaves of *N. benthamiana* were kept in a -80 °C refrigerator. The *N. benthamiana* inoculated with TSWV-LE were grown in a growth chamber at 25 °C and 16 h light/8 h dark (5).

### ***Agrobacterium* infiltration**

*Agrobacterium tumefaciens* strain GV3101 was transfected with recombinant plasmids using electroporation and used for agroinfiltration of *N. benthaminana* leaves essentially as described before (6, 7). *A. tumefaciens* cells were resuspended in agroinfiltration buffer (10 mM MgCl<sub>2</sub>, 10 mM MES pH 5.6, and 100 μM acetosyringone) adjusted to an optical density OD<sub>600</sub> of 1.0 and incubated for 2 to 3 h in the dark at room temperature. Equal volumes of *Agrobacterium* cultures (final concentration OD<sub>600</sub> = 0.2) harboring the p2300-N, p2300-RdRp, pCB301-derived reporter or full-length infectious clone vector(s), were mixed with one volume of bacterial mixture (final concentration OD<sub>600</sub> = 0.05) containing the NSs and P19-

HcPro-γb. Fully expanded leaves of *N. benthamiana* plants at the 6-7-leaf stage were infiltrated with *Agrobacterium* cultures using 1 mL needleless syringes. The *N. benthamiana* plants infiltrated with *Agrobacterium* cells were grown in a growth chamber at 25 °C and 16 h light/8 h dark (5).

### **Western blot analysis**

Total protein was extracted from 1 g *Agrobacterium*-infiltrated leaf patches, healthy or TSWV-systemically infected leaves of *N. benthamiana* in 1 mL extraction buffer (10 % v/v glycerol, 25 mM Tris-HCl, pH 7.5, 1 mM EDTA, 150 mM NaCl, 10 mM dithiothreitol, 2 % w/v polyvinylpyrrolidone, 0.5 % v/v Triton X-100 and 1× protease inhibitors cocktail) (8). Protein samples were separated by SDS-PAGE, transferred to PVDF membranes (GE Healthcare, UK), blocked with 5 % w/v skim milk solution and incubated with a polyclonal antiserum specific to TSWV N, NSm, NSs, Gn, Gc, GFP, mCherry or T7 RNA pol at room temperature for 1 h or overnight at 4 °C. After incubation in a secondary antibody containing HRP-conjugated goat antirabbit (1:10000) for 1 h, the blots were developed using the ECL Substrate Kit (Thermo Scientific, Hudson, NH, USA). The signal was visualized using the ChemiDoc Touch Imaging System (Bio-Rad). Protein loading was evaluated by staining the blots with Ponceau S. Rabbit polyclonal antibodies against RdRp, Gn, Gc, NSm, N and NSs were produced in our laboratory. Secondary antibody HRP-conjugated goat antirabbit IgG was purchased from Sigma-Aldrich (St. Louis, MO, USA).

### **Northern blot analysis**

For Northern blot analysis of TSWV gRNAs, agRNAs or viral mRNA transcripts, total RNAs were extracted from *Agrobacterium*-infiltrated leaf patches, healthy or TSWV-systemically infected leaves using an RNAPrep Pure Plant Kit (Tiangen Biotech, Beijing, China), respectively. DIG-labeled probes specific for sense or antisense eGFP, NSs, NSm, and L-5'UTR was synthesized using a DIG High Prime RNA labeling kit (Roche, Basel, Switzerland). Total RNAs were separated in 1 % formaldehyde agarose gels and transferred to Hybond-N<sup>+</sup> membranes (GE Healthcare, UK) (9). The membrane blots were hybridized with the specific DIG-labeled probe, then processed using a DIG-High Prime Detection Starter Kit II (Roche) and the manufacturer's protocol.

### **RT-PCR and sequencing analysis**

For detecting the virus in leaves of *N. benthamina* systemically infected with SR<sub>(+)</sub>eGFP+MR<sub>(-)</sub>mCherry+L<sub>(+)</sub>opt, S<sub>(+)</sub>+MR<sub>(-)</sub>eGFP+L<sub>(+)</sub>opt, SR<sub>(+)</sub>eGFP+M<sub>(-)</sub>opt+L<sub>(+)</sub>opt or rTSWV recovered from the full-length cDNA clones, total RNAs were extracted from leaf areas with systemic symptoms. First-strand cDNAs were synthesized using M-MLV Reverse Transcriptase (Promega, Madison, WI, USA). RT-PCRs were performed to detect the SR<sub>(+)</sub>eGFP, MR<sub>(-)</sub>mCherry, MR<sub>(-)</sub>eGFP, S<sub>(+)</sub>, M<sub>(-)</sub>opt and L<sub>(+)</sub>opt minigenomes and genomic RNA using their specific primers. The PCR products were inserted into a pMD19-T vector (Takara, Dalian, China) and sequenced by Sanger dideoxy-mediated chain-termination DNA sequencing method at Sangon Biotech (Shanghai, China). The

primers used in this study are listed in [SI Appendix, Table S3](#).

### **Fluorescence microscopy**

Agro-infiltrated *N. benthamiana* leaves were examined for fluorescence expression using an OLYMPUS IX71-F22FL/DIC Inverted Fluorescence Microscope (OLYMPUS, Tokyo, Japan) with a green or red barrier filter. The leaf sample was fixed in water on a microslider under a coverslip to detect eGFP and mCherry fluorescence, respectively. Fluorescence images were processed using ImagePro (OLYMPUS, Tokyo, Japan) and Adobe (San Jose, CA, USA) Photoshop programs.

### **Transmission electron microscopy and immunogold labelling**

Samples (1 mm × 4 mm) were excised from leaves of *N. benthamiana* plants infected with rTSWV rescued from the full-length infectious clones. The sample tissues were fixed in 2.5 % v/v glutaraldehyde and 1 % w/v osmium tetroxide in 100 mM phosphate buffer (PB; pH 7.0) as described by Li *et al.* (6, 10) and then embedded in Epon 812 resin as instructed by the manufacturer (SPI-EM, Division of Structure Probe, West Chester, PA, USA). Ultrathin sections (70 nm) were mounted on formvar-coated grids and then stained with uranyl acetate for 10 min, then with lead citrate for 10 min. The stained sections were examined with a transmission electron microscope (TEM; H-7650, Hitachi, Japan).

For immunogold labelling, the TEM sections were incubated in 1 % BSA buffer for 10 min, then for 1 h in 1:200 v/v diluted rabbit polyclonal antibody against Gn. The



sections were rinsed with PB, then incubated in 1:30 v/v diluted goat antirabbit IgG conjugated with gold particles for 1 h. After several rinses with PB, the sections were examined with a transmission electron microscope.

### **Imaging GFP in infected plant using hand-held UV lamp**

GFP fluorescence in leaves was monitored with a hand-held 100 W, long-wave UV lamp (UV Products, Upland, CA, USA), then photographed using a Canon EOS 70D digital camera (Canon, Japan) with a 58 mm UV filter.

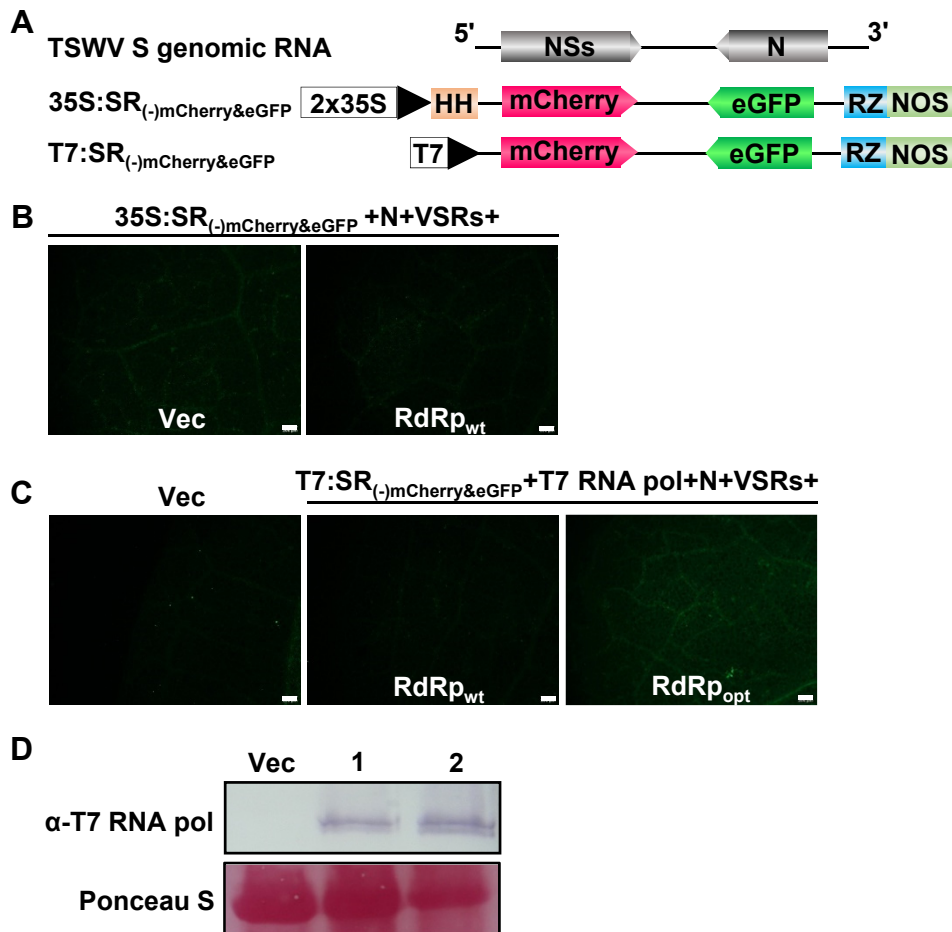

**Fig. S1** Functional analysis of wild-type RdRp and use of T7 promoter in a mini-genome replication assay. (A) Schematic diagram of TSWV 35S:SR<sub>(-)</sub>mCherry&eGFP and T7:SR<sub>(-)</sub>mCherry&eGFP mini-replicon reporters. (B) Wild-type RdRp (RdRp<sub>wt</sub>) or the empty vector (Vec) was co-expressed with 35S:SR<sub>(-)</sub>mCherry&eGFP, N, VSRs (VSRs: NSs, P19, HcPro and  $\gamma$ b) in *N. benthamiana* leaves. Expression of eGFP was detected with a fluorescence microscope. (C) Constructs coding for T7:SR<sub>(-)</sub>mCherry&eGFP, T7 RNA polymerase (pol), N and VSRs were co-expressed with RdRp<sub>wt</sub> or RdRp<sub>opt</sub> in *N. benthamiana* leaves. Replication of T7:SR<sub>(-)</sub>mCherry&eGFP was examined by monitoring eGFP fluorescence with a fluorescence microscope. Empty vector (Vec) pCB301 was used as a negative control. Bars represent 200  $\mu$ m. (D) Western immunoblot detection of T7 RNA polymerase (pol) using a T7 RNA pol-specific antibody. Ponceau S staining was used as protein loading control. Lane 1: sample from leaves coexpressing T7:SR<sub>(-)</sub>mCherry&eGFP, T7 RNA Pol, N, VSRs and RdRp<sub>wt</sub>; lane 2: sample from leaves coexpressing T7:SR<sub>(-)</sub>mCherry&eGFP, T7 RNA Pol, N, VSRs and RdRp<sub>opt</sub>.

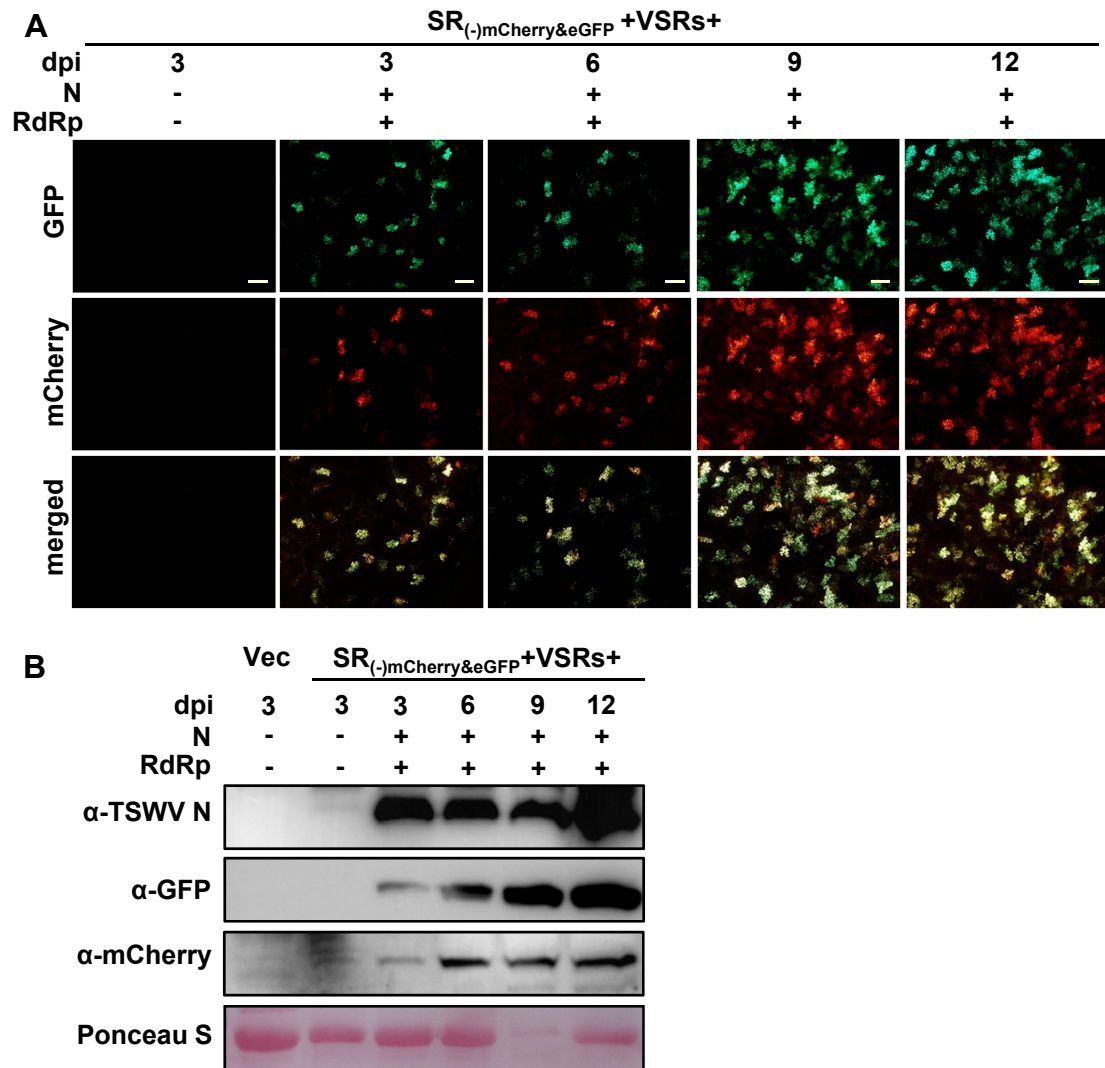

**Fig. S2** Time-course analysis of gene expression from the SR<sub>(-)mCherry&eGFP</sub> mini-replicon in *N. benthamiana* leaves. (A) Foci of eGFP and mCherry fluorescence expressed from SR<sub>(-)mCherry&eGFP</sub> in *N. benthamiana* leaves coexpressing N, RdRp and the VSRs at 3, 6, 9 and 12 dpi, respectively. Fluorescence of eGFP and mCherry was photographed with a fluorescence microscope using GFP and RFP filters, respectively. Bars represent 400  $\mu$ m. (B) Western immunoblot detection of N, eGFP and mCherry proteins in leaves shown in panel A, using specific antibodies against N, GFP and mCherry, respectively. The empty vector (Vec) was used as a negative control. Ponceau S staining was used as protein loading control.

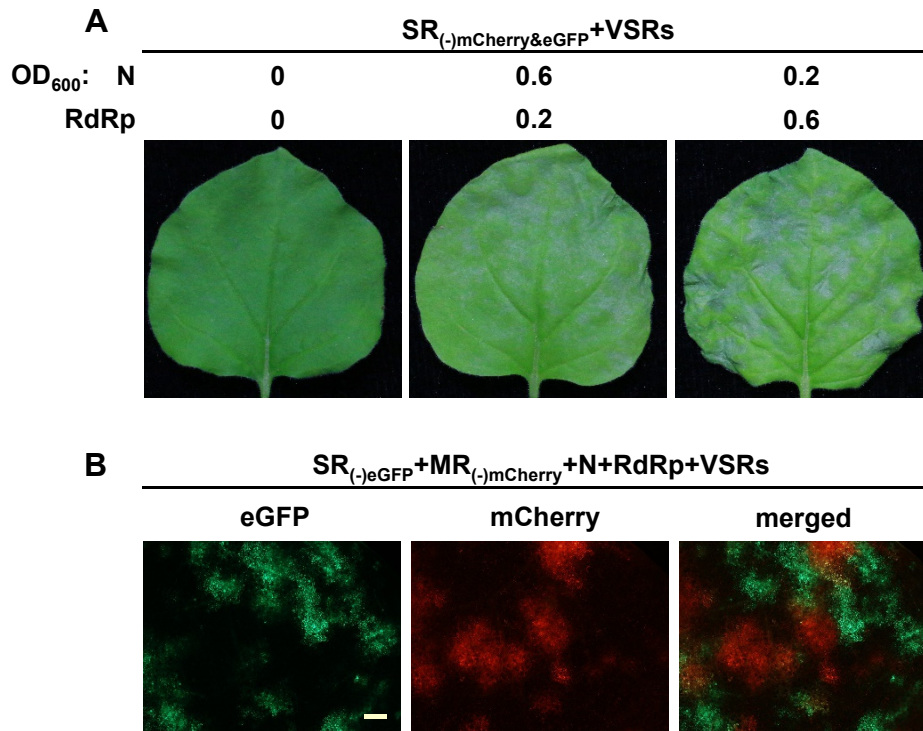

**Fig. S3** Effects of ectopic expression of TSWV RdRp and N on host cells or intercellular movement of SR<sub>(-)GFP</sub> and MR<sub>(-)mCherry</sub> mini-replicons in *Nicotiana benthamiana*. (A) Expression of N or RdRp at high concentrations (OD<sub>600</sub> > 0.6) of *Agrobacterium* induced cell death in the infiltrated leaves of *N. benthamiana*. *Agrobacterium* at OD<sub>600</sub> = 0.6 containing the binary expression constructs for N or RdRp were mixed with fixed amounts of *Agrobacterium* containing the RdRp or N construct (OD<sub>600</sub> 0.2), respectively, for infiltrating *N. benthamiana* leaves with *Agrobacterium* containing SR<sub>(-)mCherry&GFP</sub> and four VSRs; cell death phenotype was photographed at 5 dpi. (B) Cell-to-cell movement analysis of SR<sub>(-)GFP</sub> and MR<sub>(-)mCherry</sub> in *N. benthamiana* coexpressing RdRp, N and four VSRs. Agroinfiltrated leaves were examined and photographed at 5 dpi with a fluorescence microscope. Bars represent 400  $\mu$ m.

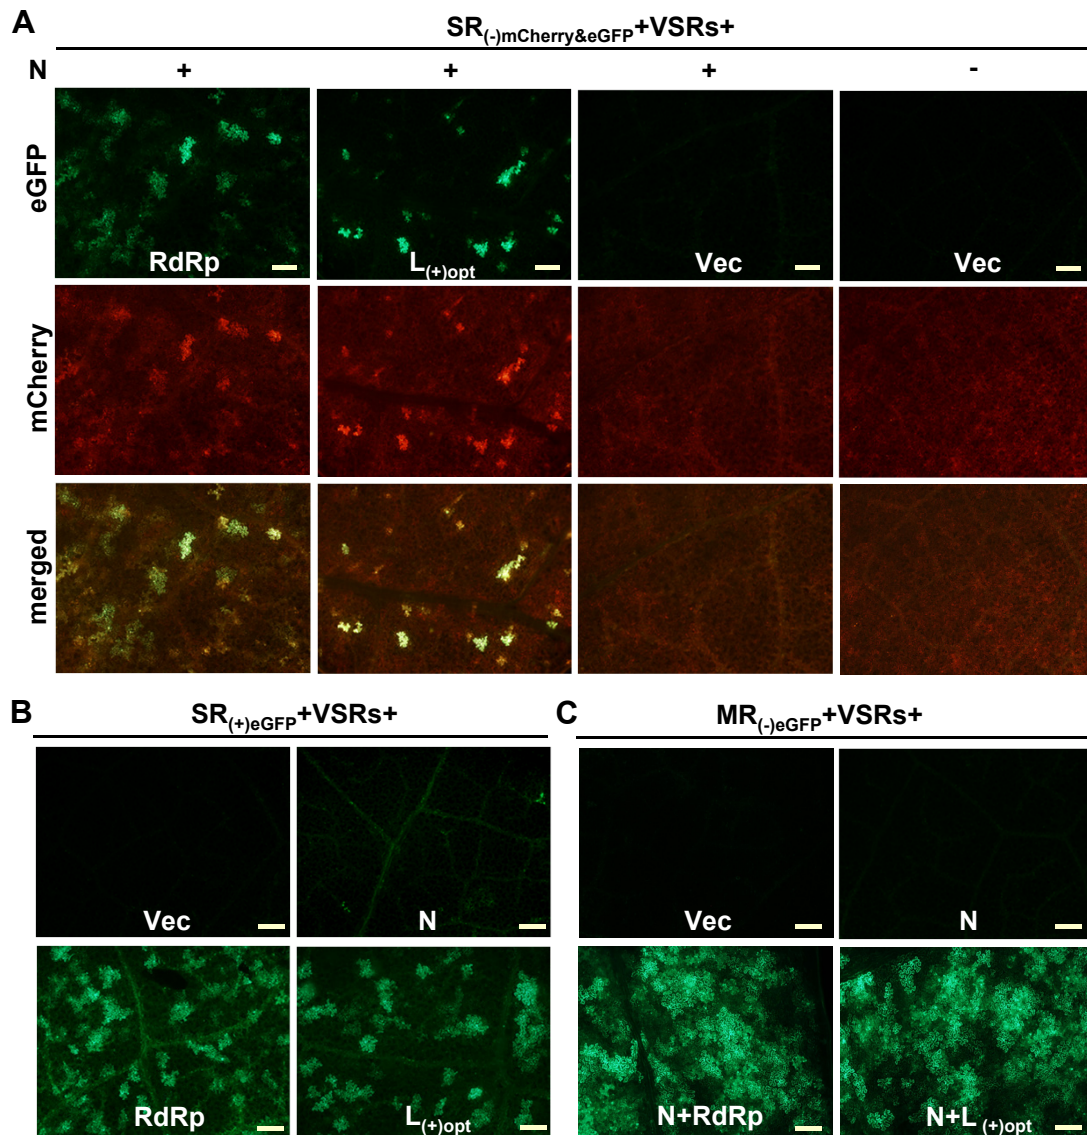

**Fig. S4** Functional analysis of RdRp expressed from TSWV  $L_{(+)\text{opt}}$ , NSm from  $MR_{(-)eGFP}$  and N from  $SR_{(+eGFP}$  using the mini-genome replication system in *N. benthamiana*. (A) Functional analysis of RdRp expressed from TSWV  $L_{(+)\text{opt}}$  using the S RNA mini-replicon system in *N. benthamiana*. The  $L_{(+)\text{opt}}$ , RdRp, or pCB301 empty vector (Vec) was coexpressed with N,  $SR_{(-)mCherry\&eGFP}$  and the four VSRs in leaves. (B) Functional analysis of N expressed from  $SR_{(+eGFP}$  in *N. benthamiana*.  $SR_{(+eGFP}$  was coexpressed with the empty vector (Vec), N, RdRp or  $L_{(+)\text{opt}}$  in leaves in the presence of four VSRs. (C) Functional analysis of NSm expressed from  $MR_{(-)eGFP}$  in *N. benthamiana*.  $MR_{(-)eGFP}$  was coexpressed with the empty vector (Vec), N, N+RdRp or N+ $L_{(+)\text{opt}}$  in leaves in the presence of four VSRs. Agroinfiltrated leaves were examined with a fluorescence microscope at 3 dpi for foci showing mCherry and eGFP fluorescence. Bars represent 400  $\mu\text{m}$ .

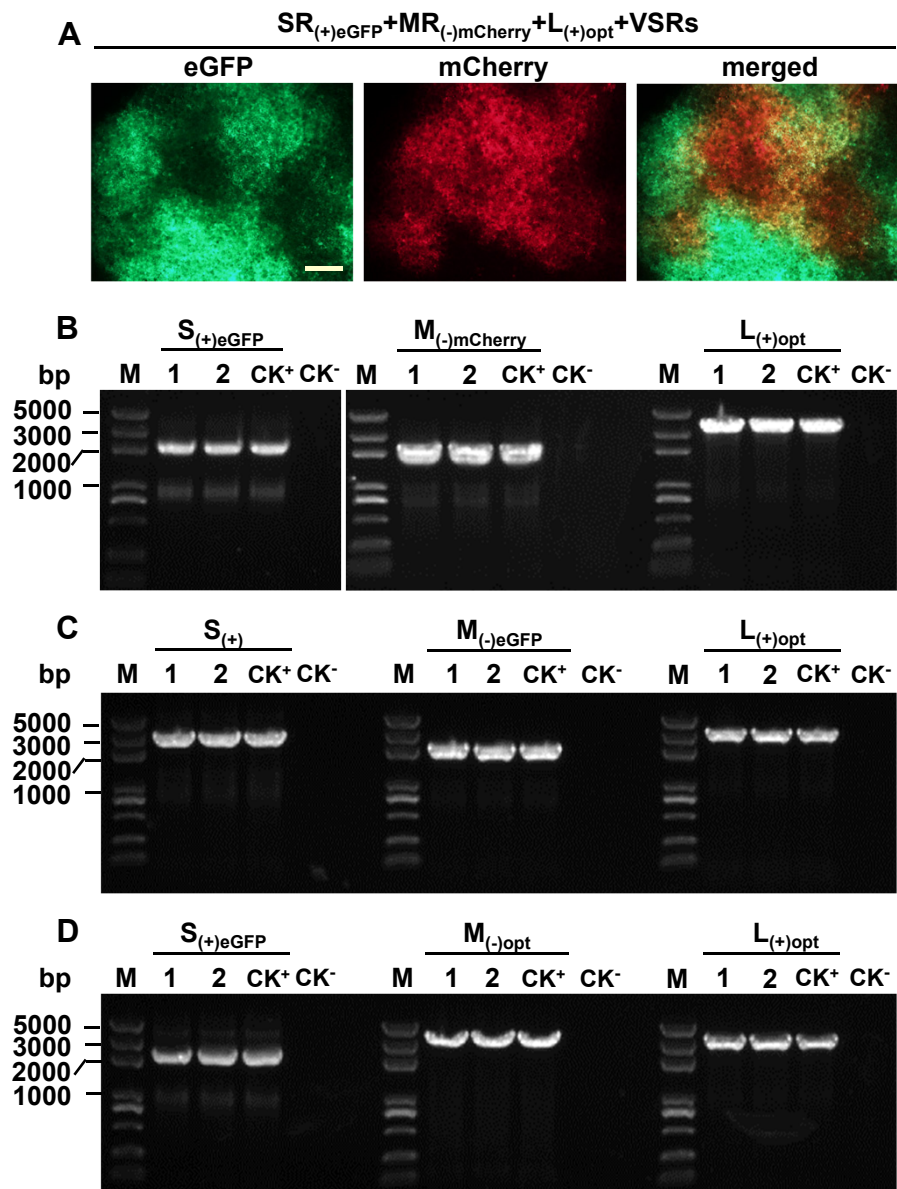

**Fig. S5** Analysis of *N. benthamiana* leaves agroinfiltrated with constructs of  $SR_{(+)}eGFP$ ,  $MR_{(-)}mCherry$  and  $L_{(+)}opt$ , or  $SR_{(+)}eGFP$ ,  $M_{(-)}opt$  and  $L_{(+)}opt$ , or  $S_{(+)}$ ,  $MR_{(-)}eGFP$  and  $L_{(+)}opt$ . (A) Local infection analysis of cell-to-cell movement of  $SR_{(+)}eGFP$  and  $MR_{(-)}mCherry$  coexpressing with  $L_{(+)}opt$  and four VSRs in leaves after agroinfiltration. Agroinfiltrated leaves were examined and photographed at 5 dpi using a fluorescence microscope. Bars represent 400  $\mu m$ . (B) RT-PCR analysis of systemically infected leaves from *N. benthamiana* plants after agroinfiltration with  $SR_{(+)}eGFP$ ,  $MR_{(-)}mCherry$  and  $L_{(+)}opt$  at 15 dpi. (C) RT-PCR analysis of systemically infected leaves from *N. benthamiana* plants agroinfiltrated with  $S_{(+)}$ ,  $MR_{(-)}eGFP$  and  $L_{(+)}opt$  at 15 dpi. (D) RT-PCR analysis of systemically infected leaves from *N.*

*benthamiana* plants agroinfiltrated with SR<sub>(+)eGFP</sub>, M<sub>(-)opt</sub> and L<sub>(+)opt</sub> at 15 dpi. All agroinfiltrations included four VSRs. For RT-PCR, total RNA was purified from systemically infected leaves to detect S, M or L segments using segment-specific primers. Amplicons were resolved by electrophoresis in 1 % agarose. Lanes 1 and 2 represent two biological replicates of systemically infected leaf samples. For positive controls (CK<sup>+</sup>) of proper fragment size, PCR was performed on plasmids carrying S<sub>(+)</sub>, M<sub>(-)opt</sub>, L<sub>(+)opt</sub> or derivatives. As the negative control (CK<sup>-</sup>), RT-PCR was performed in the absence of nucleic acids. DNA size markers are shown on the left.

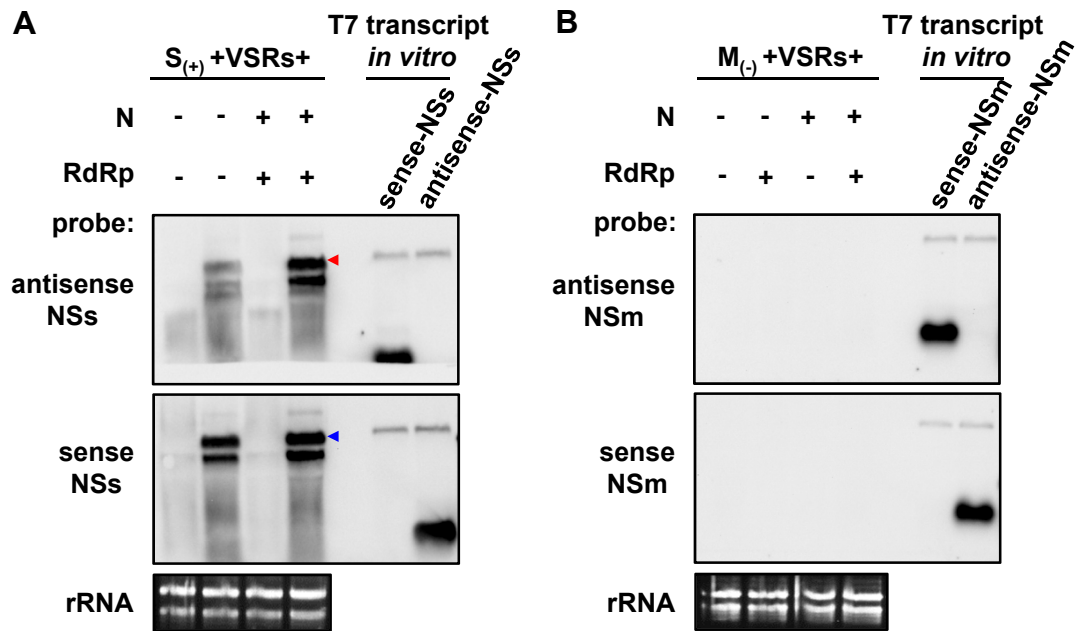

**Fig. S6** Northern blot detection of viral RNA synthesis produced from full-length  $S_{(+)}$  and wild-type  $M_{(-)}$  replicons. (A and B) The full-length  $S_{(+)}$  or wild-type  $M_{(-)}$  was coexpressed with the empty vector (Vec), N, RdRp<sub>opt</sub> or N+RdRp<sub>opt</sub> in *N. benthamiana* leaves in the presence of three (P19, HcPro and  $\gamma$ b) VSRs for  $S_{(+)}$  or four VSRs (P19, HcPro,  $\gamma$ b and NSs) for  $M_{(-)}$ . Genomic RNAs (blue arrow), antigenomic RNAs (red arrow) of S (A) were detected with DIG-labeled sense or antisense NSs and NSm probes, respectively. Ethidium bromide staining was used as RNA loading control.



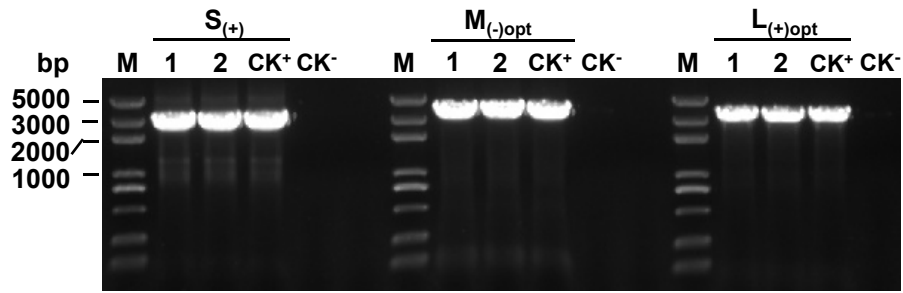

**Fig. S7** RT-PCR detection of  $S_{(+)}$ ,  $M_{(-)opt}$  and  $L_{(+)-opt}$  genomic RNA in leaves of *N. benthamiana* systemically infected with rTSWV.  $S_{(+)}$ ,  $M_{(-)opt}$  and  $L_{(+)-opt}$  and the four VSRs were coexpressed in leaves via agroinfiltration. Total RNA was purified from systemically leaves of agroinfiltrated plants, and  $S_{(+)}$ ,  $M_{(-)opt}$  and  $L_{(+)-opt}$  were detected by RT-PCR using segment-specific primers. RT-PCR products were resolved by electrophoresis in 1 % agarose. Lanes 1 and 2, two biological replicates of systemic infected leaf samples; RT-PCR on plasmids carrying S, M and L as DNA template were used as positive controls (CK<sup>+</sup>). RT-PCR running without the DNA template were used as negative controls (CK<sup>-</sup>). DNA size markers are shown on the left.

**Fig. S8. Wild-type and optimized RdRp gene sequence used in the study.**

**Wild-type RdRp gene sequence**

ATGAACATCCAGAAAATACAAAAATTAATAGAGAATGGAACTACTTTATTGTTGTCTATTGAGGATTGTGTAGGTTCTAATT  
ACGACCTAGCTTTGGATTACATAAGAGAAATAGTGATGAGATCCCAGAAGATGTGATTATTAATAATAATGCAAAAAATTA  
TGAGACGATGAGAGAGTTAATTGTCAAAATCACTGCTGATGGAGAAGGACTAAACAAAGGGATGGCAACTGTAGACGTC  
AAGAAGTTAAGTGAGATGGTTTCTCTATTTGAGCAAAAATACCTAGAAAACAGAGTTAGCAAGGCATGATATTTTGGAGAG  
CTGATCTCCAGGCACCTGAGAATAAAGCCCAAACAAAAGAGTGAAGTGGAGATAGAGCATGCGCTCAGAGAATATCTGGA  
TGAACCTTAACAAAAAGTCTGCATTAATAAGCTCTCTGATGATGAGTTTGGAGAGAATAAATAAAGAATATGTGGCAACTAA  
CGCCACACCTGACAACTATGTGATATATAAAGAATCAAAAAACAGTGAGCTTTGTTAATCATTATGATTGGAAAAATATCT  
GTCGATGCCAGGACAGAACTAAAACAATGGAGAAATACTACAAAATATCTGGAATCTTTCAAAGATATAAAAGTGAAT  
GGAAAGCCATTCTGGAAGATCACCTGTTTTCGTTTCTATAGTTATATTGAAACCTATTGCTGGGATGCCAATCACTGTTA  
CTAGCAGCAGGGTTTTGGAGAAATTTGAAGATTCTCCATCAGCATTGCATGGAGAAAGAATAAAGCATGCTAGAAATGCC  
AAATTGCTAAATATTTCTCATGTTGGGCAAATAGTTGGAACCACACCCACAGTGGTGAGAACTATTATGCAAACTCAA  
AAGATCAAATCTGAAGTCAGAGGAATACTAGGTGATGATTTTGGATCTAAAGATGTGTTTTTTAGTCACTGGACCAGCAAA  
TACAAAGAAAGAAATCCTACTGAAATAGCCTATTCTGAAAGATATTGAAAGAATAATTGATTCACTTGTACAGATGAAATAA  
CTAAAGAGGAAATAATACATTTTTTTGTTGGAAATTTCTGTTCCACATTGAAACAATGAATGACCAGCATATCGCCGACA  
AATTTAAAGGGTACCAAAGCTCTGTATCAATTTAAAAATAGAGCCAAAAGTTGATTTAGCTGATTTGAAGGACCACTTAA  
TCCAGAAGCAGCAAATATGGGAATCTCTGTATGGGAAACATCTTGAGAAAATCATGCTTAGAATTAGAGAAAAAAGAAA  
AAAGAAAAAGAAATACCTGACATAACCACAGCTTTTAAACAGAATGCTGCTGAATATGAAGAAAAGTACCCAAACTGTTTT  
ACAAATGATCTCTGAAACTAAAATACTTTTCTATGACTTGGTCCCAAGTTTTGAAAAATAGAATTGAGCTCAGAG  
GTAGATTACAACAACGCAATTATAAACAAGTTTCGGGAAAGCTTCAAAAGTTCTCAAGGGTTATTTATAATAGCCCATATA  
GTTGCATAAATAACCAAACAAATAAAGCAAGAGATATAACAACCTAGTTAGACTGTGTTAACAGAGCTAAGTTGTGATA  
CAACAAAAATGAAAAGCAGGAGCTTGAGGATGAAATAGATATAAACACTGGGAGTATTAAGTTGAGAGAACAAAAAAA  
TCTAAAGAATGGAATAAGCAGGGTTCGTGTTTAAACAGGAACAAAAATGAATTTTGCATGAAAGAGACAGGCAGGGAGAA  
CAAACTATCTATTTTAAAGGCTTAGCAGTAATGAATATAGGAATGAGTTCTAAAAAAGAATTCTAAAAAAGAAGAAATA  
AAAGAGAGGATTTCTAAAGGCTTGGAAATGATACCTCTGAAAGGCAGGCTGACCCAAATGATGATTATCAAGTATAGAC  
ATGTCATCTCTGACTCATATGAAAAACTGATAAGACATGACAACGAGGATAGCTTAAAGCTGGTGTGAAAGGATTAAGGAC  
TCTTTGTTGTTCTTCATAATGGTGATATAAGAGAGGAAAGGCAAGATCACATCTGTTTACAATAATTATGCTAAAAATCCTG  
AATGCTTGATCAATTCAAGATTCACTACTGAAAACTGAATTAGAGACTTGCAAAAAAGATAAACAATTTATGCAATGACCTAG  
CCATTTACCATTACTCTGAAGACATGATGCAATTTCCAAAGGTTAATGTGGCTGACAGGTACATGACCAAAGAAAGTT  
TCAAAATACTAACCACAGCAAATACGAGCATGATGCTATTGGCATTCAAAGGAGATGGAATGAACACCGGAGGATCAGGA  
GTTCCCTTACATAGCATTGCATATAGTGATGAAGACATGTCAGATCAATTTAACATATGTTATACTAAAGAAATTTATAGCTA  
TTTCCGAAATGGTAGTAATTACATTTATATAATGAGACCACAGAGACTCAATCAGGTGAGGCTGCTAAGCCTTTTCAAAC  
GCCTAGTAAAGTTCCTGTATGTTTTGCACAATTTTCAAAGAAAGCTAACGAAATGAAAAATGGCTGAAAAACAAAGATAT  
AGAAAAAGTAAATGCTTTTCTATGACAATGACTGTAAAAACAGATATTAATAAATATTGTGTTTTTCATCTGTCATGATAGGA  
ACTGTGACAAAGCTCAGCAGGATGGGAATTTTTGACTTCATGCGGTATGCAGGTTTTTTGCCACTGTCTGATTATTCTAAT  
ATAAAAGAGTACATTAGAGACAAATTTGATCCTGATATAACCAATGTGGCAGATATCTATTTTCGTTAATGGAATCAAAAAGC  
TATTGTTCAAGATGGAAGATCTCAATTTAAGCACAAATGCCAAGCCTGTTGTTGTAGATCACGAAAATGATATTATAGGAG  
GGATAACAGACTTGAATATAAAATGTCCAATAACAGGATCAACTCTACTGACTCTTGAGGATTTGTATAAATATGCTATTT  
GGCTATTTACATGATGCCTAAATCATGCACAATCACGTTTCAATCTAAACAAGCTTGTTAAATGTCCCTGCTGAGTGGGA  
GCTAAAGTTCAGAAAAGAGTTAGGTTTCAACATATTTGAGGACATATAACCCTAAGAAAGCAATGTTTGTATGACAAAGACCT  
ATTCTCTATAAATGGAGCTTTGAACGTGAAAGCATTATCTGATTACTATCTAGGAAATATAGAAAATGTGGGTTTGTATGAGA  
TCAGAAATAGAAAATAAAGAAGATTTTCTAAGCCCTGTATATAAATATCTACTTTAAATCTTCAAAAAATGCTCGCAGT  
CAACATTATAAGTACTGATGAGATAATAGAGTGTCTCCAGAATGCAAAGATCCAAGATATAGAAAATTGGAAAGGAAATA  
ACCTGGCCATTATAAAGGGCTTATAAGAACCTACAATGAGGAGAAAAACAGATTGGTGGAAATTTTTGAAGATAATTGTG  
TCAATCACTGTATCTGTAGAAAAGCTTAAAGAGATAATTAATAGTGGATCGATAACTGTAGGGAAATCCGTAAACATCTAA  
ATTTATAAGAAATAACCATCCTTTAACAGTAGAAAACATATCTCAAAACAAAATATATTATAGAAAATAATGTGACTGTTTTAA  
AGTCTAAAAAAGTATCAGAGGAGCTTTATGACCTTGTAACAGTTTTCATAACATGATGGAAATAGACTTAGATTCTGTTAT

GAACTTGGGAAAAGGTACAGAAAGGAAAAAACACACATTCTTGCAGATGCTTGAATTTGTCATGTCCAAAGCTAAAAATG  
TCACCGGGTCTGTAGATTTTCTAGTTTCTGTTTTTGAAAAAATGCAGAGAACCAAAAAGACAGAGAAATATACTTGATGA  
GTATGAAAGTGAAATGATGCTTTATTTTATAGAGCACACATTCAAACATGTTGCGCAGAGTGATCCATCAGAAGCCATAT  
CTATAAGTGGAGACAATAAAATAAGGGCACTTTCTACATTATCTTTGGACACAATCACGTCTTACAACGACATTTTAAACAA  
AAATTCAAAGAAAGTCAAGATTGGCTTTCTGTCTGTGATCAATCGAAATGGTCGGCATCAGACCTTACCTATAAATATGT  
TTAGCTATCATATTAATCCAATTTAACTACTGGTGAAGCTAGTTAATGATAGAATGTATTTAATGTATGTTAAATTGAA  
GAAGTTTTGTATACCAACAGATATTTTTTGAATCTAAGAAAAGCTCAAGGAACTTTCTGGGCAAAATGAAAAGCTCCATAGG  
ACTTTTGACTAAAGGTTTGACGACAAAACATACCCTGTAGCATGAACTGGTTACAAGGCAATTTAAATATCTGTCTTC  
TGTTTACTCTTGTGCAATGAAAGCTTATCACAAGACTTTAGAATGCTACAAAGACTGTGATTTCCAAACTAGATGGAT  
TGTGCACTCTGATGATAATGCGACATCATTGATAGCCAGTGGAGAGGTCGATAAAATGCTAACAGACTTTTCAAGCTCATC  
TCTGCCAGAAATGTTGTTTGAAGCATTGAAGCTCATTTCAAAGCTTTTGCATAACTTTGAACCAAAAAAGAGTTATGC  
TTCTTCATCAGAAGTAGAGTTTATATCTGAAAGAATTGTAATGGAGCAATTATTCCTCTCTATTGCAGACATTTAGCAAAT  
TGTGTCACAGAATCTTACATATAAGTTATTTTGTATGATCTAATGCTACTAAGTATACATGTTACGATGCTTCTGAGAAAAG  
GCTGTCTAATGAAGTTATACCTTTTGGCTTATGGGGCTGTACAGGTACAAGCATTAAAGCATCTATTCAATGCTTCTGGTG  
AAGTGAATGATAGCATCAGAATTTTAAAGAAGCTTGGAGTAAGTTTAAAGTCAAACGAGATTTCCCAAACATGGGGGGC  
TGTTGACTTCTCTATAGAGCCATTGTCTATATTAGGTCCATCATCGAATGATCAAATCATCTATTAATGTGATAAGAG  
ATTTTTTGAACAAAAAGTTTGAAGAAAGTAAAAAGATAGCGTCTCTTCTTCCAGCTATCTACAGATGAGATTCAGAGAGC  
TAAAAGGAAAGTATGAAAAAGAACTCTGGAAGAAAAAGATAAAAAAGATGATATTTCTTATCAATCTGTTTGAAGAAAGCAT  
CAGTGTCTGAAGATTCAGACGTTCTAACAATCGGGATGAAATTTCAAACATGTTAACTCAGATTATAAAATGCCCCAATTT  
TATAAATGAGAATGCTTTAAACAAGATGTCAAGTTATAAAGATTTTTCAAACCTTACCCTAATTTGAAAAAGAATGAAGAT  
TTATATAAAGTACTAAGAACTTAAAGATAGACGAGGATGCTATTTTAGAGGGAGATGAGTTATATGAGAAGATTGCATCTA  
GCTTAGAAATGGAATCTGTTTATGACATAATGATAAAAAATCCTGAAACAATCTGATAGCACCATTGAATGATAGAGATTT  
TTACTTAGTCAGCTGTTTATGACACAAGCCCTTCTAAAAGGAATCAGTTATCTAACCAATCTACAGAGAACTTGCTTT  
GGATAGAGTATTAAGTCAAAAGCTAGAACATTTGTAGACATTTCTTCCACTGTGAAGATGACTTATGAAGAAAACATGGA  
AAAGAAAATCTTGAAATGCTAAAATTTGATTIAGATTATATTGTTTCAATTTAAAAATGTTAAATCTAGTGATCAAGGAT  
GTTAATTTAGCATGCTGATCCCAATATTGGATTCTGCATACCCTTGTGAATCTAGGAAAAGAGATAACTACAATTTCCAGT  
GGTTTCCAGACTGAGAAGTGGATAACCTGTAGTTGAAGGCTCTCCGGGATTAGTGGTAATGCATGCTGTCTATGGATCAAAT  
TATATAGAAAATTTAGGTTTAAAAAACATCCCTCTAACAGACGATAGCATTAAATGTTTTAAACAAGCACGTTTGGAAACAGGTT  
TAATCATGGAGGATGTAATTCCTTAGTTAAAGGCAAAGACAGCTTCGAAACAGAGGCTTTCAGCAATTTAAACGAATGTC  
AAAGATTGGTGAAGCATGCAATTATATGATAGCAGCACAAAACAGGCTTTTAGCAATTAACACATGCTTTACTAGGAAAA  
GCTTCCCCTTCTATTCTAAATTAACCTAGGGAGAGGGTTTATCTCAAACACATTAGCTCTCCTATCCACCATCTACAGTAA  
AGAAGAATCCTATCATTTTGTCTTACAGCTAGTTATAAATTAGACAAAATATTAGAAGTGTGATAAGTGTCTCAGCAAGAT  
ATGAACTTAGAGAAAATACTGGACTGCTGTATACATATCAGATAAATTGCAGTCACTTTTCCCAACAATTAACAAGAGAG  
GATATAGTTTGTATTTGCAAAATGTGTGCTTAGACAGCAAACCTATATGGCAGAGTCTAGAAGACAAAATGAAAAAGATT  
AACAAATCAACAGCAAGTGGCTTACAGTGTCAAATGTGATTCTGTACATAACAGTGAATTGAACACAATCCAGAAACA  
AATTGTCTGGATGTGGAACATGGGTTTATGTTCTCATAGAACATTAGATTTTGTATCAGGTATATTAGGAGAAGTGATGTA  
AGATATGTGAAAACCTGAAGAAACAAGACGAATCAGGAAATATATCTCTGGAACATGTACAAAATCGGGATCATGACAAAG  
AGCTGTTATGTTCAATTGATAGCATCTGATCAAGATGTAGCAGTTTCTTTGAGGACACCATTGAGATATTGAATGAAAGA  
GATTATCTTTTTGACACATACAGAGAAAGTATAGAGAAATTTATGAGAAAATTTATGTTTGAATAAAGTGAACATAATAAAT  
CAAAAACAACCAGATTGTTTTCTAGAACAGGAGATGCCTGCATCAGAATGACCACAGACAACAAGATGATTGTAAGG  
GTTAATGCCACATCAAGACAAATAAGACTAGAGAATGTGAAATTAGTTGTGAAGATAAAATATGAAAACGTGAACCTCCGAT  
GTGTGGGATATTATAGAAAGCCAAAATCTTAGTCTTAAAGGCTCCCTGAAGTAGGGGAATGTTTCTCTGATATGTACAAA  
ACTGCAGACTCTGAAACTGAAAACAATCAAAACCGTAAAAACAGGCTTATGACTTCTTAACTTTCATAGAAGCCTTTGGA  
AACTTATCAGCAGATCAAAGAGATTGTGGATGATGATATCAGAGAAAAGATGGATGAATTTAATGAACATCCGGGAT  
ACCTGCTTAGAAGGTTTGGAAAACTGCAAAAGTGTGGAAGAATATGATAGCTATCTTGTGAAAATGGGTTAATGATACA  
GTAGAACTATTCGAAAACCTGTTAAGAACACATGACAACCTTTGAAAATGAGTATAGTCCCTCTGTTTTTCAGAGATTGTTGAC  
AAAGCAAAACAGTATACTAGAGATTAGAAGGTTTCAAAGAAATACTGCTCATGCTTAAATATTTCTTTGATAAATGATGCAT  
CAGGATTTAAAAGCTATAGAGCCACTGGAATGCATGCTGTGCAACTAATGGCAAAAAAGCACATAGAGATAGGGGAATTC  
AACTTGCTAGGAATGATCCAACCTGATTAAGCTTGCAAAACATGCCACAAACGACTCTATATTAACCTTAGCAAGTTTG  
AGGAATGTTCTTAGCAGGACATATGCCACATTTGGGAGAAGAATAAGATTGAATCATGATCTGGATTTGCAAAAATAACTTG

ATGGA AAAAGTTATGATTTCAAGACACTGGTTTTACCAGAAAATAAATTATCAGA ACTATCAAGGGAGATACTAAAAGAG  
AATGGGTTTGTATATCTGGAGAGAATCTAAAAATGGATAGGTCTGATGAAGAATTTGAAGGTCTTGCCAGTTTTAATGTG  
TTGAGGCTAGATGAGGAAGAAATGTATGAAGGTTTGGATCAAAGAAATGAAGATTA AAAAGAAAAAGAAAGGGTCTTTATT  
CCCGGCAAATACACTTTTACTAAGTGAGTTGATAAAGTTCTTGATTGGAGGGATAAAGGGAACCCAGTTTTGATATAGAGAC  
ATTGTTGCGGAATAGTTTTAGACCAGACATATTTTCAACTGACAGACTGGGCAGATTAAGTTCCAGTGTACCTGCACTCAA  
AGTTTATGCAACTGTTTATATGGAATATAAGAATGTCAATTGTCTTTAAATGAGATAGCTGACAGCTTAGAAGGTTATCTA  
AAACTGACAAAAAGCAAGTCTAAGGAGCATTCTTATCTGGAAGAGTTAAGAAAGCTTTGATACAATTAAGAGATGAACA  
ATCGCGAACTAAAAACTAGAGGTCTATAAAGATATCGCAAATTTCTTTCTAGGCACCCATTATGCTTATCAGAAAAACA  
TTGATGGAAGATACTTACTCTGATATCAATGATTATATCATGCAAA CAAGAGAGATTATTTTGTAGTAAAATAAGTGAGT  
TGGATGAGGTTGTTGAAACAGATGAAGACAATTTCTTGCTTAGTTATCTAAGAGGGGAAGAAGATGCCTTTGACGAAGAT  
GATTCTGATGAAGAAGAAGACCGATTAA

### Opimized RdRp gene sequence

ATGAACATTCAGAAGATCCAAAAGCTGATCGAGAACGGCACCACCTTGCTGCTTTCTATTGAGGATTGCGTGGGCAGCAA  
CTACGATCTTGCTCTTGATCTGCACAAGCGGAACTCCGATGAGATTCCTGAGGACGTGATCATCAACAACAACGCCAAGA  
ACTACGAGACTATGCGTGAGCTGATCGTGAAGATCACTGCTGATGGTGAGGGTCTGAACAAAAGGTATGGTACCCTGGAC  
GTGAAGAACTGTCTGAGATGGTGTCTCTGTTCCGAGCAGAAGTACCTTGAGACTGAGCTTGCTAGGCACGATATCTTCGG  
CGAGCTTATTTCTAGGCACCTGAGGATCAAGCCGAAGCAGAGATCTGAGGTTGAGATTGAGCACGCTCTGAGAGAGTAC  
CTGGACGAGCTTAAACAAGAGTCTGCATCAACAAGCTGAGCGACGATGAGTTCGAGCGGATCAACAAGAATATGTGG  
CCACCAACGCTACCCCGACAATTACGTTATCTACAAAGAGAGCAAGAACAGCGAGCTGTGCTGATCATCTACGACTGG  
AAGATCTCTGTGGATGCCAGGACTGAGACTAAGACCATGAAAAAGTACTACAAGAACATCTGGAAGTCTTCAAGGACAT  
CAAGGTGAACGGCAAGCCTTTCTTGAGGATCATCTGTGTTCTGTGAGCATCGTGCATCTGAAAGCCTATTGCTGGCATGC  
CTATTACCGTGACCTTAGCAGAGTGTCTCGAGAAGTTTGGAGACTCTCCTTCTGCACTTCACGGCGAGAGGATTAAGCAC  
GCTAGGAACGCTAAGCTGTGAACATTTCTCACGTGGGTGATCGTGGGTACTACTCTACTGTGGTGAGGAACTACTA  
CGCTAACACCCAGAAGATCAAGTCCGAGGTTAGGGGTATCCTGGGTGATGATTCGGCAGCAAGGACGTGTTCTTCTCTC  
ACTGGACCTCCAAGTACAAAAGAGCGGAACCTTACCGAGATCGCTTACTCTGAGGATATCGAGCGTATCATCGACAGCCTT  
GTGACCGAGAGATCACCAAAGAAGAGATTATCCACTTCTGTTCGGCAACTTCTGCTTCCACATCGAGACAATGAACGA  
CCAGCACATTGCCGACAAGTTCAAGGGCTATCAGTCTCTTGCATCAACCTGAAGATCGAGCCTAAGGTGGACCTGGCTG  
ATCTTAAGGATCACCTGATTCAGAAGCAGCAGATTTGGGAGAGCCTGTACGGTAAGCACCTCGAGAAGATTATGTGCGG  
ATCCGTGAAAAAGAAAGAAAGAGAAAGAGATCCCGGACATCACACCGCCTTCAATCAAAATGCTGCCGAGTACGAAG  
AGAAGTACCCGAACTGCTTACCAACGACCTGTGAGAGACAAAGACCAACTTCTCTATGACCTGGTACCCGAGCTTCGA  
GAAAATCGAGCTGTCTAGCGAGGTGACTACAACAATGCCATTATCAACAAGTTCCGTGAGAGCTTCAAGTCCAGCAGCA  
GGGTGATCTACAACAGCCCTTACAGCTGCATTAACAACCCAGACCAACAAGGCCCGGGATATCACTAACCTTGTGAGGCTT  
TGCTGACCGAGCTTTCTTGCGATACCACCAAGATGGAAAAGCAAAGAGCTTGAGGACGAGATCGACATCAACACCGGTA  
GCATTAAGTTCGAGCGGACCAAGAAAAGCAAAGAGTGGAAACAAGCAGGGCTCTGCCTTACTAGGAACAAGAACGAGTT  
CTGCATGAAGGAAACCGGCCGAGAGAAACAAGACCATCTACTTCAAGGTCTTGCCGTGATGAACATCGGCATGTCTCTTA  
AGAAGCGGATTCTGAAAAAGAGGAAATCAAAGAGAGGATCAGCAAGGGCTCGAGTACGATACTTCTGAGAGACAGGC  
TGATCCGAACGACGACTACAGCAGCATCGATATGTCATCACTGACCCATATGAAGAAGCTCATCCGGCAGGATAACGAGG  
ACTCACTTTCTTGGTTCGAGCGAATCAAGGACAGCTTGTTCGTGCTTCAACAACGGCGATATCAGAGAAGAGGGCAAGAT  
CACCAGCGTGTACAACAATTACGCTAAGAACCCGAGTGCCTGTACATCCAGGATTCTGTGCTTAAAGACCGAGCTGGAAA  
CCTGCAAGAAAATCAACAACTGTGCAACGATCTGGCCATCTACCACTACAGCGAGGACATGATGCAGTTCTCCAAGGGT  
TTGATGGTGGCCGATCGGTACATGACCAAAAGAGTCTTTCAAGATCCTGACCAACCGCAATAACAGCATGATGTGCTTGC  
TTTCAAAGGCGACGGTATGAAACTGTTGGTTCTGGTGTCTTCAATTTGCCCTGCACATCGTGGATGAGGATATGTCCG  
ATCAGTTCAACATCTGCTACACCAAGAGATCTACAGCTACTTCCGGAACGGCTCCAACATACATCTACATCATGAGCCCG  
AGAGGCTTAAACAGGTGAGGCTTCTTTCACTGTTCAAGACCCCTTCAAGGTGCCAGTTTGCCTTCGCCAGTTTCAAGCAA  
AAGGCCAACGAAATGAAAAATGGCTGAAGAAACAAGGACATTGAGAAGTCAACGTGTTGAGCATGACCATGACCGTGA  
AGCAGATCCTGATCAACATCGTGTCTCCAGCGTATGATTGGCACCGTACTAAGCTTTCTCGGATGGGCATCTTCGAC  
TTCATGAGGTACGCTGTTTCTTGCCGCTGTCCGACTACTCCAACATCAAAGAGTACATCCGGGACAAGTTCCGACCCCGA  
TATTACCAATGTGGCCGATATCTACTTCGTGAACGGGATCAAGAAACTGCTGTTCGGATGGAAGATTTGAACCTGAGCA

CCAACGCAAAGCCTGTTGTGGTGGATCACGAGAACGATATCATCGGTGGCATCACCGACCTGAACATCAAGTGCCTATT  
ACTGGTTCTACCTGCTGACCCTTGAGGACCTGTATAACAATGTGTACCTCGCCATCTACATGATGCCGAAAGTCTCTGCAT  
AACCACTGTCACAACTTACCAGCCTGCTTAATGTTCTGCTGAGTGGGAGCTGAAGTTCCGGAAAGAGCTTGGCTTCA  
ACATTTTCGAGGACATCTACCCGAAGAAAGCCATGTTTCGATGACAAGGACCTTTCAGCATTAAACGGCGCTCTTAACGTG  
AAGGCCCTGAGCGATTACTACCTGGGTAAACATCGAGAATGTGGCCTGATGAGGTCCGAGATTGAGAACAAAAGAGGACT  
TCCTGTCTCCGTGCTACAAGATCTTACCCTGAAAGTCCAGTAAAGAAGTGCAGCCAGAGCAACATCATCAGCACTGATGAG  
ATCATTGAGTGCCTGCAGAACGCAAAGATTGAGGACATCGAAAACCTGGAAGGGCAACAACCTGGCTATTATCAAGGGCCT  
GATCCGGACCTACAACGAGGAAAAGAATCGGCTGGTTGAGTTCCTCGAGGATAACTGCGTGAACAGCCTGTACTGGTC  
GAGAAGCTTAAAGAGATCATTAAACAGCGGCAGCATCACCGTGGGAAAGTCTGTGACTAGCAAGTTCATCCGTAACAATCA  
CCCGCTGACCGTGAAACCTACCTCAAGACTAAGCTGTACTATCGGAACAACGTGACCGTGTGAAGTCTAAGAAGGTG  
AGCGAGGAACTGTACGACCTCGTTAAGCAGTTCACAAACATGATGGAATCGACCTGGACTCTGTGATGAACCTTGTAA  
GGTACTGAGGGGAAAGAAGCACACCTTCTGACAGTGTGAGTTCGTGATGAGCAAGGCCAAGAATGTGACCGGTTCT  
GTGGATTTCTCGTGAGCGTGTTCGAAAAGATGCAGAGGACCAAGACCGACCGTGAGATCTACCTGATGAGCATGAAGG  
TGAAGATGATGCTGTACTTCATCGAGCATACTTCAAGCACGTGGCCAGTCTGATCCTTCTGAGGCTATTAGCATCAGCG  
GCGACAACAAGATTAGGGCTCTGTCTACCCTTAGCCTGGACACCATTACCAGCTACAACGCATCCTCAACAAGAATAGC  
AAGAAGTCTCGCTGGCTTTCTGAGCGCTGATCAATCTAAGTGGTCCGCTTCTGACCTGACCTACAAGTACGTGTGGC  
CATCATTCTGAACCCGATTCTTACTACTGGCGAGGCCTCTTTATGATCGAGTGCATTCTGATGTACGTGAAGCTGAAGAA  
AGTGTGCATCCCGACCGACATTTTCTGAACCTTAGGAAGGCTCAGGGCACCTTCGGTCAAAAACGAAACCGCTATTGGTC  
TGCTGACCAAGGGACTTACCACCAACTTACCCTGGTGTCTATGAACTGGCTGCAGGGTAACTGAACTACCTCTCTTCT  
GTGTACCCTCCTGCGTATGAAGGCTTACCACAAGACTCTCGAGTGTATAAGGACTGCGACTTTCAGACCCGGTGGAT  
CGTTCACTCTGATGATAACGCAACCAGCCTGATCGCTTCAGGTGAGGTTGACAAGATGTGACCGACTTCTCCTTCTCAT  
CTCTGCCTGAGATGCTGTTTCAGATCCATCGAGGCTCACTTCAAGTCTTTCTGCATCACACTCAACCCCAAGAAGTCATAC  
GCCAGCTCAAGCGAGGTCGAGTTCATTTCTGAGAGGATTGTGAACGGCGTATCATCCACTTACTGCAGGCATCTTGC  
TAACTGTGCACCGAGTCTCTCACATCTCCTACTTCGATGACCTGATGTCCCTGTCTATCCACGTGACCATGTTGCTGAG  
AAAGGGCTGCCATAATGAGGTGATCCCTTTTGCTTACGGTGTGTGCAAGTGCAGGCTCTCTCTATCTACTCTATGCTGC  
CTGGTGAGGTGAACGACAGCATCCGGATCTTAAAGAAGCTGGGCGTCAGCCTCAAGTCCAACGAGATTCTACTAATCATG  
GGCGGTTGGCTGACCTCTCCTATTGAGCCTTTGTCTATTCTGGGCCCCAGCAGCAACGACCAGATTATCTACTACAACGT  
GATCCGGGATTTCTGAACAAGAAATCCCTGGAAGAGGTGAAGGACTCCGTGTCCTCATCTTCTTACCTGCAGATGAGGT  
TCAGGGAACCTCAAGGGCAAGTACGAGAAGGGTACTCTGGAAGAGAAGGACAAAAAGATGATTTCTTATCAACCTCTC  
GAGAAGGCCAGCGTGTCCGAGGATAGTGATGTGCTTACCATCGGGATGAAGTTCAGACCATGCTGACCCAGATCATCAA  
GCTGCCAACTTCATCAACGAGAACGCCTTGAACAAGATGAGCAGCTACAAGGACTTCTCCAAGCTGTACCCCAACCTCA  
AGAAGAACGAGGATCTGTACAAGTCCACCAAGAACCTCAAATCGACGAGGACGCTATCCTCGAGGGTGATGAGCTTTAT  
GAGAAGATCGCCAGCAGCCTCGAGATGGAATCTGTGCACGACATCATGATCAAGAACCCGGAAACCACTTCTGATCGCTCC  
GCTGAACGATAGGGACTTTCTGCTGTCTCAGCTGTTTCATGTACACCTTCCGTCTAAGAGGAACCACTGTCTAATCAGT  
CTACCGAGAAGCTGGCTCTTGATAGGGTGTGAGATCTAAGGCTAGGACCTTCGTGGACATCTCCTCTACCGTAAAGATG  
ACCTATGAAGAGAATGGAAGAAAGATCTTGGAGATGCTCAAGTTCGATCTCGACAGCTACTGCAGCTTCAAGACTTG  
CGTGAACTGGTGATCAAGGATGTGAACCTTCTCCATGCTTATCCGATCCTCGACTCTGCTTATCCTTGCAGTCTAGGAA  
GCGGGACAACCTACAACCTCCGTTGGTTCCAGACTGAGAAGTGGATCCCTGTTGTTGAGGGTTCTCCTGGACTTGTGGTG  
ATGCATGCTGTGTACGGGTCTAACTATATCGAGAACCTCGGCCCTTAAAGAACATCCCGCTTACCAGCAGCTATCAACGTG  
CTGACTTCTACCTTCGGCACCGGTCTGATTATGGAAGATGTCAAGAGCCTGGTGAAGGGCAAAAGACTCATTGAGACAGA  
GGCCTTCAGCAACTCTAACGAGTGCCAGAGACTTGTGAAGGCCTGCAACTACATGATCGCTGCTCAGAACAGGCTCCTG  
GCTATCAATACCTGCTTACCCTGGAAGTCTTTCCCGTCTACTCCAAGTTCATCTTGGCAGGGGCTTCATCAGCAACACC  
CTTGCTTTGCTGTCCACCATCTACAGCAAAGAGGAATCCTACCACTTCGTGTCCACCGCCTTACAAGCTGGATAAGAC  
TATCCGGACCGTGATCTCTGCACAGCAGGATATGAACCTGGAAGAGATCCTGGATACCGCCGTGTACATCAGCGACAAGC  
TTCAGTCTTTGTTCCCGAACCATCACAGAGAGGACATCGTTCATTTCCAGAACGTGTGCCTGGACTCCAAGCCTATT  
TGGCAGTCTTTGGAGGACAAGATGAAGAAGATTAACAACAGCACCGCCAGCGGCTTCAACGTGTCTAATGTGATTCTGAG  
CCACAACCTCCGAGCTGAACACCATCCAGAAAAGATCGTGTGGATGTGGAACATGGGCCTTTGCTCTCATAGGACCTGG  
ATTTCTGTATCCGTTACATCAGGCGGTCCGATGTGAGATACGTCAAGACTGAGGAACAGGACGAGAGCGGAACTACATT  
AGCGGAACCATGTACAAGATTGGCATCATGACCCGGTCTTGTACGTGCAGTTGATCGCATCAGATCAGGATGTGGCTGT  
GTCTCTTAGGACCCCTTCGAGATTCTCAACGAGAGGGATTACCTGTTTCGACACCTACCGTGAGTCCATCGAAAAGCTGC

TGCAAAAGTTCATGTTTCGACAAGGTCAAATTATCAAGTCTAAGCAGCCGCAGATTGTGTTCCTCGAGCCAGGTGATGCT  
TGCATTAGGATGACCACCGACAACAAAATGATCGTCAAGGTTAACGCCACCAGCAGGCAGATTAGGCTTGAGAACGTTAA  
GCTGGTGGTGAAGATTAAAGTATGAGAACGTGAACTCCGACGTGTGGGACATCATTGAGAGCCAGAAGTCTCTCGTTCTC  
CGGCTTCTGAAAGTTGGTGAGTGCTTCAGCGACATGTATAAGACCGCTGACAGCGAGACTGAGACAATCAAGACTGTGA  
AGAACCGGCTGATGACCTCTCTGACCTTCATTGAGGCTTTCGGCAAACCTCAGCCAGCAGATCAAAGAAATCGTGGACGAT  
GACATCAGGGAAAACCATGGACGAGTTCCTCATGAACATCCGTGATACCTGCCTTGAGGGTCTTGAGAATTGCAAGAGCGT  
GGAAGAGTACGACTCCTACCTTGATGAGAACGGGTTCAACGATACCGTCGAGCTGTTCCGAGAATCTTCTGAGGACCCAC  
GACAACTTCGAGAACGAGTACTCTCCACTGTTTCAGCGAGATCGTGGATAAGGCTAAGCAGTACACCAGGGATCTCGAGG  
GCTTTAAAGAAATCCTGCTGATGCTGAAGTACTCTCTGATCAACGACGCCTCCGGGTTCAAGTCATATAGAGCTACTGGTA  
TGACGCGGTTGAGCTGATGGCTAAGAAACACATTGAGATCGGCGAGTTCAACCTGCTGGGTATGATTCAGCTTATCAAG  
GCTTGCGAGACTTGCCACAACAACGACTCCATTCTAACCTGGCCAGCCTTAGGAATGTGTGTCTAGGACTTACGCTAC  
TTTCGGCAGGCGGATCAGGTTGAATCACGATCTGGATCTGCAGAACAACTTATGGAAAAGAGCTACGACTTCAAGACCT  
TGGTGTCCCCGAGATTAAGCTCTCTGAGCTGAGCAGGAAAATCCTGAAAGAGAACGGCTTCGTTATCTCCGGCGAGAA  
CCTTAAGATGGACAGGTCCGATGAAGAGTTCGAGGGGCTCGCTTCATTCAATGTGCTTAGGTTGGACGAGGAAGAGATG  
TACGAGGGGCTGATCAAAGAAATGAAGATCAAGCGGAAGAAGAAGGGCTCTCTGTTCCCTGCTAATACCTGCTTCTGTC  
CGAGTTGATCAAGTTCCTGATCGGCGGTATTAAGGGCACCAGCTTCGATATTGAGACTCTGCTCCGGAACCTCATTAGGC  
CGGATATCTTCTTACCGACAGGCTTGGTAGGCTCTCTTCTTCTGTGCCTGCTCTTAAAGGTGTACGCCACTGTGTACATGG  
AGTACAAGAACGTCAACTGCCCTCTGAACGAGATCGCCGATTCTTTGAGGGTTACCTGAAGCTCACCAAGTCCAAGAG  
CAAAGAACACTTCTTGAGCGGACGGGTGAAGAAGGCTCTTATTCAGTTGAGGGACGAGCAGTCCAGGACCAAAAAGCTC  
GAGGTCTACAAGGATATCGCCAACCTCCTTAGCAGGCACCCTCTTTGCCCTGTCTGAAAAGACACTGTACGGCCGGTACAC  
CTACAGCGATCAACGATTACATCATGCAGACCCGGGAAATCATCCTCTCTAAGATCTCCGAGTTGGATGAGGTGGTGG  
AAACTGACGAGGACAACTTCTGCTCTTACCTTAGGGGCGAAGAGGATGCTTTCGATGAGGACGATTCTGATGAGGA  
AGAGGACACCGATTAG

**Fig. S9. Wild-type and optimized GP gene sequence used in the study.**

**Wild type GP gene sequence**

ATGAGAATTTAAACTACTAGAACTAGTGGTAAAAGTGAGTCTTTTACAAATGCCCTGAGTTCTGTCTTGTGGCATTCTGCTGAGAAAT  
TTGATCTTCAGAGCCACAGATGCCAAAAGTAGAAATAATTCGTGGAGATCATCCTGAGGTTTATGATGATTCTGCTGAGAAAT  
GAAGTACCCACTGCTGCATCGATTCAACGCAAGGCTATCTTGGAGACTTAACTAGTCTAATGCTAGAATCTCAGACTCCT  
GGAAACCGTCAGATACGAGAAGAATCAACCATCCCTATTTTTGCTGGGTCAACTACGAAAAATAATCTCTGTCTCG  
GATCTTCTAACTGCTTGAATGCTTCTTCATTAATAATGCGAGATAAAAGGGATATCCACTTATAATGTTTATTATCAAG  
TGGAAAAATAATGGTGTATATATTCTGTGTTTCTGATTGAGCAAGGGTTAGAAAAATGTGACAATTCTTTAAATTTGCC  
AAAGAGATTCTCAAAGTCCCGGTTATCCCATTACCAAACCTTGACAACAAAAGGCATTTTTCAAGTTGGAACAAAATCTT  
CATTTAGAAAAGCCTGACACAAGATAATTATCCTATAACTTATAACTCGTACCCTACTAATGGAACAGTATCATTACAAACC  
GTAAAGTTATCTGGAGACTGCAAAATAACTAAATCAAACCTTGCCAATCCCTATACTGTTAGCATCACTAGCCCCGAGAAG  
ATCATGGGTTATTTGATAAAAAAACCTGGTGAATAATGCGGAACACAAGGTCATATCTTTTTCTGGATCAGCAAGCATCACT  
TTTACTGAAGAAATGTTGGATGGTGAGCAATCTCTGTGCGGTGACAATCAGCTAAAATACAAAAACAAAACAAAAG  
AGTTAGAGATTGCATAATCAAATATTCAAAGAGCATTATAAGCAAACAGCCTGCATCAATTTCTCTGGATAAGATTAATA  
TTGATAGCTTTGTTGATCTATTTCCCTATCCGGTGGTTAGTAAA CAAGACA ACTAAACCTCTCTTTCTCTGGTATGATCTTA  
TAGGCTTGATCACATACCCTATTTTGTGTCTATAAATGCTTATGGAAATATTTCCATTCAAATGTTCTAACTGTGGCAAT  
TTGTGCATAATCACACATGAGTGTACTAAAATTTGCATCTGCAACAAAAGCAAAGCCTCAAAAAGAACACTCTTCAGAGTGT  
CCCATACTGTCCAAAGAAAACAGATCATGACTACAAACAAACATAAGTGGACTAGCATGGAATGGTTCCATCTAATAGTGAAC  
ACTAAGCTAAGCTTTAGTTTGTCTGAAAATTTGTGACTGAAATCTTAATAGGTTTGGTCAATTTTGTCTCAAATGCCCATGTCTA  
TGGCTCAAACACTCAATGTTTGTAGTGGATGTTTTATGTTCCAGGCTGTCCAGTTTGGTTACAAGCAAATTTGAAAAAT  
GCCCTGAAAAAGATCAATGTTACTGTAATGTAAGAAGATAAGATTATAGAAAAGTATCTTTGGCACTAACATTGTTATAGA  
AGGTCCATATGATTGCATAGAGAACCAGAATTGTGTTGCACACCCATCTATTGATAATCTTATAAAAATGTAGATTAGGTTGC  
GAATACTAGATTTATTTTCGCAACAAACCTTTGTATAATGGGTTTTTCAGATTATACAGGAAGCTCTTTGGGGTTAACATCGG  
TTGGTCTGTATGAGGCTAAGAGATTGAGGAATGGTATAATAGATTCTATAACCGTACAGACAAGATTTCGGGAATGATTG  
CAGGAGATTCTCTAGACAAAAATGAAA CAAGCATA ACCAGAGAACATTCTGCCTAGACAATCATTGATCTTTGATTCTGTTG  
TGGATGGGAAATATAGATATATGGTAGAACAACTCTTTTAGGAGGAGGAGGACTGTATTATGTTAAATGATAAGACCT  
CAGAAAAAGCAAAAAAATTCGTGATTATATCAAAAGTGTGGGAATTCATTATGAAGTGTCTGAAAAATA CACAACAGCTC  
CTATCCAAAGCACTCACACAGATTTTTATTCCACTGTACAGGAACTGTGACACTTGCAGAAAAAATCAAGCTTTAAACAG  
GTTTCCAAGATTTTGTATAACCAACTTCTTATTGGGGATGTGAAGAAGCTTGGTGTTTTGAATTAATGAAGGTGCTA  
CATGCGGGTCTGTGCAAAATATTATGACATGGATAAATCATATAGAATTTATTCAAGTGTAAAATCAAATATAAGTGGCAGA  
TGTTTGCATTTCTGGTATTTTAGGAGGTCAATGCTCAAGGATTACTGAAGAGGTTCCCTTATGAAAATGCATTGTTTCAAGC  
TGATATACAAGCAGATCTGCACAATGATGGTATCACTATAGGTGAAGTATAGCTCATGGACCTGACAGCCATATTTATTCT  
GGAAATATTGCAAACTGAAATGATCCTGTCAAATGTTTGGTCAATCAATGACTCATGATGGAGTGCCATTTTTACTA  
AGAAAACTCTAGAAGGAGATGCATGTCTGGGATTGTGCAGCAATAGGGAAAAAATCAATCACTATTA AAAACATGCGGA  
TATGACACATACAGATTTAGATCTGGTTAGAGCAAATATCAGATATCCATTAGTTTCAAAGATTTCTCTAGTTTTTTCTT  
GGAAAAATCTTTAGTTTAGGGAACCTCAAGATTGTCGTTGATCTTCCATCTGATCTTTTAAAGTTGCTCCTAAGAGACC  
TTCCATAACTTCGACAAGATTGAATTGCAATGGCTGTCTTCTATGCGGTCAAGGTTTATCTTGCAATTTGGAATTTTTCTCA  
GATTTGACATTTTCTACTGCAATTTCTATAGATGCTTGCTCTCTATCTACTTATCAGCTGGCTGTTAAAAAAGGGTCAACA  
AATACAACATAACAATGTTTTGTTCTGCTAATCCGGATAAGAAGAAAATGACATTGTATCCAGAAGGCAATCCGGATATTTCT  
TGTGGAAGTTCTGGTCAATAATGTTATTGTAGAAGAACCGGAGAACATAATAGATCAAAATGATGAGTATGCTCATGAAGA  
ACAACAATATAATCTGATTCCTCAGCATGGGGCTTCTGGGATTATATAAAAGCCATTCAATTTCAATGCAAGTTACTTT  
GGCTCATTTTTTGTACTATCAGAGTATATTGCTTATTGCATTCATTTTCTTGTGATTATTTCTGTCTATTCTAAACAAC  
AATTTGTAAAGGATATGTCAAGAATAAATCTTATAAATCTAGATCCAAGATAGAGGATGATGATGATTCTGAGATCAAAGCC  
CCTATGTTAATGAAAGATAACAATGACAAGACGAAGGCCACCTATGGATTTCTCTCACCTGTCTGA

**Optimized GP gene sequence**

ATGAGGATCCTGAAGCTTCTTGAGCTGGTGGTGAAGGTGAGCCTGTTTACCATTGCTCTGTCTCTGTGCTTCTGGCCTT  
CCTTATTTTCAGGGCTACCGACGCTAAGGTCGAGATCATTAGAGGCGATCATCCTGAGGTGTACGACGACTCTGCTGAGA  
ATGAAGTTCCTACCGCTGCTAGCATTACGCGGAAGGCTATTCTTGAGACTCTGACCTCTCTGATGCTCGAGTCTCAAAC  
CCTGGAACCAGGCAGATTCTGTGAGGAAGAGTCTACCATTCTCTCGCTGGCAGCACTACCCAGAAGATTATCTCCGT  
TAGCGACCTGCCTAACAACTGCCTGAACGCTTCTCTGAAGTGGGAGATCAAGGGCATCAGCACCTACAACGTTTACT  
ACCAGGTGAGAAACAACGGCGTGATCTACTCTTGCCTGTGAGATTCTGCTGAGGGCCTTGAGAAGTGGGACAACCTCT  
TAACCTGCCGAAGCGGTTCTTAAGGTGCCAGTGATTCTATACCAAGCTGGACAACAAGCGGCACCTCTCTGTGGGCA  
CCAAGTTCTCATTAGCGAGTCTCTGACCCAGGACAACCTCCGATTACCTACAACAGCTACCTACCAACGGAAACCGTG  
TCTCTTCAGACCGTTAAGCTGTCTGGCGATTGCAAGATCACCAAGAGCAACTTCGCTAACCCGTATACCGTGAGCATTAC  
CTCTCCAGAGAAGATCATGGGCTACCTGATCAAGAAGCCTGGCGAAAAACGCTGAGCACAAGGTGATCTCATTCTCCGGCT  
CTGCTTCCATTACCTTACCGAAGAGATGCTGGATGGTGGAGCACAACTTCTCTGCGGTGATAAGTCTGCTAAGATCCCT  
AAGACCAACAAGCGTGTGAGGGACTGCATCATCAAGTACAGCAAGAGCATCTACAAGCAGACCGCCTGCATCAACTTCT  
TTGGATTAGGCTGATCCTGATCGCCCTGCTGATCTACTTCCCTATTAGATGGCTGGTGAACAAGACCACCAAGCCGCTTT  
CTTGTGGTACGATCTGATCGGCCTGATTACTTACCCAATCCTGTGCTGATTAAGTGCCTGTGGAAGTACTTTCCGTTCAA  
GTGCAGCAACTGCGGCAACCTGTGATTATTACTCACGAGTGCACCAAGATCTGCATCTGCAACAAGAGCAAGGCCAGC  
AAAGAACACTCTAGCGAGTGCCGATCCTGAGCAAAGAAACCGATCACGACTACAACAAGCACAAAGTGGACCAGCATGG  
AATGGTTCCACCTTATCGTGAACACCAAGCTCAGCTTACGCTGCTTAAGTTCGTGACCGAGATTCTGATCGGTCTGGTG  
ATCCTTAGCCAGATGCCATATGTCTATGGCTCAGACTACCCAGTGCCCTAGCGGTGCTTTTATGTTCTGGTTGCCCTGTG  
CTGGTGACCTTAAGTTTGAAAAGTGCCCTGAGAAGGACCAGTGCTACTGCAACGTGAAAGAGGACAAGATCATCGAGT  
CCATCTTCGGCACCAACATCGTGATTGAGGGTCTAACGACTGCATCGAGAACCAGAATTGTGTGGCTCACCCGAGCATC  
GACAACCTGATTAAGTGTAGACTGGGCTGCGAGTACCTGGACCTGTTTAGAAAACAAGCCTCTGTACAACGGCTTCAGCGA  
CTACACCGGTTCTTCACTTGGTCTTACCTCTGTGGGACTGTACGAGGCTAAGAGGCTTAGGAACGGCATCATGACTCTT  
ACAACCGGACCGATAAGATCAGCGGTATGATCGTGGTGACAGCCTGGATAAGAACGAGACTTCTATCCCCGAGAACATC  
CTGCCAAGGCAGTCTCTGATTTTCGACTCTGTGGTGGATGGCAAGTACCGGTATATGGTTGAGCAGAGCCTTCTTGAGG  
TGGTGGAACTGTGTTATGCTGAACGATAAGACCTCTGAGAAGGCCAAGAAGTTCGTATCTACATCAAGAGCGTGGGC  
ATCCACTACGAGGTGTCAGAGAAGTATACCACCGCTCCTATTCAGTCTACCCACACCGATTTCTACTCTACCTGCACCGGT  
AATTGCGATACCTGCAGAAAGAACCAGGCTCTGACAGGCTTTCAGGACTTCTGCATTACCCCTACTCTTACTGGGGTTG  
TGAAGAGGCTTGGTGCTTCGCTATTAACGAGGGTGTACTTGGCGCTTCTGCCGGAATATCTACGACATGGACAAGAGCT  
ACCGGATCTACAGCGTGCTGAAGTCTACTATCGTTGCCGACGTGTGCATCTCCGGTATTCTTGGTGGACAGTGCTCTAGG  
ATTACCGAAGAGGTTCCATACGAGAACGCTCTGTTCAGGCTGATATTAGGCTGATCTGCACAACGATGGCATCACCAT  
TGGTGAGCTTATTGCTACGGACCGGACAGCCATATCTACTCCGGTAACATTGCTAACCTGAACGACCCGGTGAAGATGT  
TCGGTCATCCTCAGCTTACTCATGACGGCGTGCCAATCTTACCAAGAAAACCCCTGAGGGCGACGACATGTCTTGGGAT  
TGTGCTGCTATCGGCAAGAAAGTCCATCACCATCAAGACCTGCGGTTACGACACTTACAGGTTTACAGGCTTGGTCTTGAGCA  
GATCTCTGACATCCCCATCAGCTTCAAGGACTTCAAGCTCATTCTTCTGGAAAAGAGCTTACAGCTTGGGGAAGCTGAAGA  
TCGTGGTGGATCTGCCTAGCGATCTTTTCAAGGTTGCACCTAAGCGGCCGTCTATCACTTCTACTAGGCTTAACTGCAAC  
GGCTGCCTTCTTGTGGTACGGCCTTCTTGCATCCTCGAGTCTTCTCTGATCTGACCTTACGACCGCCATCTCTATC  
GATGCTTGCTTTGTCTACCTACCAGCTGGCTGTGAAGAAGGGCAGCAACAAGTACAACATCACCATGTTCTGCAGCGC



AAACCCGGACAAGAAAAAGATGACTCTGTACCCTGAGGGCAACCCCGATATTTCTGTTGAGGTGCTCGTGAACAACGTG  
ATCGTTGAGGAACCTGAGAACATCATCGATCAGAACGACGAGTACGCTCACGAGGAACAGCAGTACAACAGCGATTTCATC  
TGCTTGGGGATTCTGGGATTACATCAAGTCCCGTTCAACTTCATTGCCAGCTACTTCGGCAGCTTCTTCGATAACAATCAG  
GGTGATCCTGCTTATCGCCTTCATCTTCCTGGTTATCTACTTCTGCAGCATCCTGACCACCATCTGCAAGGGTTACGTGAA  
GAACAAGTCCTACAAGAGCCGGTCCAAGATCGAGGATGATGACGACTCAGAGATTAAGGCCCGATGCTGATGAAGGAC  
ACTATGACTAGAAGGCGGCCTCCGATGGATTTCTCTCATCTTGTTAG

**Table S1. The predicted intron splicing sites of wild-type RdRp gene.**

| Position (bp) | Putative splice site          | Sequence             | Score* | Intron GC* | Activations** |              | Confidence** |
|---------------|-------------------------------|----------------------|--------|------------|---------------|--------------|--------------|
|               |                               |                      |        |            | Alt./Cryptic  | Constitutive |              |
| 69            | Alt. isoform/cryptic donor    | TGAGGATTGCgtggcgagca | 4.835  | 0.529      | 0.954         | 0.035        | 0.963        |
| 175           | Alt. isoform/cryptic donor    | GAGACTATGCgtgagctgat | 4.841  | 0.514      | 0.933         | 0.051        | 0.946        |
| 205           | Constitutive donor            | ACTGCTGATGgtgaggtct  | 12.212 | 0.500      | 0.370         | 0.546        | 0.322        |
| 223           | Alt. isoform/cryptic donor    | CTGAACAAAgtatggctac  | 10.886 | 0.500      | 0.802         | 0.142        | 0.823        |
| 261           | Alt. isoform/cryptic donor    | GTCTGAGATGgtgtctctgt | 5.341  | 0.486      | 0.882         | 0.086        | 0.903        |
| 280           | Alt. isoform/cryptic acceptor | gttcgagcagAAGTACCTTG | 5.730  | 0.514      | 0.943         | 0.055        | 0.942        |
| 281           | Alt. isoform/cryptic donor    | TCGAGCAGAAgtaccttgag | 5.847  | 0.500      | 0.816         | 0.135        | 0.834        |
| 336           | Constitutive acceptor         | ttattctagGCACCTGAGG  | 4.932  | 0.486      | 0.212         | 0.770        | 0.725        |
| 579           | Alt. isoform/cryptic acceptor | tgatgccagGACTGAGACT  | 4.087  | 0.500      | 0.696         | 0.295        | 0.576        |
| 602           | Alt. isoform/cryptic donor    | CCATGGAAAgtactacaag  | 6.059  | 0.457      | 0.939         | 0.044        | 0.953        |
| 642           | Alt. isoform/cryptic donor    | GGACATCAAGgtgaacggca | 7.873  | 0.514      | 0.821         | 0.135        | 0.835        |
| 681           | Alt. isoform/cryptic donor    | TCCTGTGTTcgtgagcatcg | 6.292  | 0.529      | 0.839         | 0.123        | 0.853        |
| 738           | Alt. isoform/cryptic acceptor | tgaccttagCAGAGTGCTC  | 3.060  | 0.500      | 0.836         | 0.157        | 0.812        |
| 741           | Alt. isoform/cryptic acceptor | cctctagcagAGTGCTCGAG | 3.393  | 0.514      | 0.762         | 0.227        | 0.703        |
| 831           | Alt. isoform/cryptic donor    | CATTTCACgtgggtcaga   | 5.665  | 0.500      | 0.943         | 0.042        | 0.955        |
| 835           | Alt. isoform/cryptic donor    | TCTCACGTGGgtcagatcgt | 6.026  | 0.500      | 0.936         | 0.048        | 0.949        |
| 843           | Alt. isoform/cryptic donor    | GGGTCAGATCgtgggtacta | 5.056  | 0.514      | 0.903         | 0.074        | 0.918        |
| 864           | Alt. isoform/cryptic donor    | TCCTACTGTGgtgaggaact | 11.320 | 0.500      | 0.901         | 0.072        | 0.920        |
| 906           | Alt. isoform/cryptic donor    | CAAGTCCGAGgttagggta  | 10.127 | 0.514      | 0.709         | 0.226        | 0.682        |
| 913           | Alt. isoform/cryptic donor    | GAGGTTAGGGgtatcctggg | 4.945  | 0.514      | 0.953         | 0.032        | 0.967        |
| 971           | Alt. isoform/cryptic donor    | GGACCTCCAgtacaaagag  | 5.665  | 0.514      | 0.934         | 0.049        | 0.948        |
| 1185          | Alt. isoform/cryptic donor    | CGAGCCTAAGgtggacctgg | 4.643  | 0.514      | 0.716         | 0.215        | 0.700        |
| 1207          | Alt. isoform/cryptic acceptor | tgatcttaagGATCACCTGA | 2.743  | 0.500      | 0.596         | 0.388        | 0.349        |
| 1249          | Alt. isoform/cryptic donor    | AGCCTGTACGgtaagcacct | 11.990 | 0.457      | 0.579         | 0.329        | 0.431        |
| 1361          | Alt. isoform/cryptic donor    | ACGAAGAGAAgtaccccaac | 5.393  | 0.529      | 0.904         | 0.069        | 0.923        |
| 1388          | Alt. isoform/cryptic donor    | CCAACGACCTgtcagagaca | 5.572  | 0.500      | 0.910         | 0.068        | 0.925        |
| 1421          | Alt. isoform/cryptic donor    | CTATGACCTGgtcaccgagc | 5.097  | 0.471      | 0.952         | 0.036        | 0.962        |
| 1492          | Alt. isoform/cryptic donor    | AACAAGTTCCgtgagagett | 6.085  | 0.500      | 0.565         | 0.376        | 0.334        |
| 1515          | Alt. isoform/cryptic acceptor | agtccagcagCAGGGTGATC | 2.527  | 0.486      | 0.940         | 0.057        | 0.939        |
| 1542          | Alt. isoform/cryptic acceptor | gcccttacagCTGCATTAAC | 3.273  | 0.486      | 0.526         | 0.454        | 0.136        |

|      |                               |                       |        |       |       |       |       |
|------|-------------------------------|-----------------------|--------|-------|-------|-------|-------|
| 1587 | Alt. isoform/cryptic donor    | CACTAACCTTgtgaggettt  | 7.336  | 0.514 | 0.944 | 0.040 | 0.958 |
| 1672 | Constitutive donor            | ATCAACACCGtagcattaa   | 5.999  | 0.500 | 0.395 | 0.516 | 0.233 |
| 1740 | Constitutive acceptor         | gcctactagGAACAAGAAC   | 7.612  | 0.529 | 0.146 | 0.841 | 0.827 |
| 1801 | Alt. isoform/cryptic acceptor | ctacttcaagGGTCTTGCCG  | 3.996  | 0.471 | 0.717 | 0.270 | 0.624 |
| 1889 | Alt. isoform/cryptic donor    | AGGGCCTCGAgtacatact   | 5.278  | 0.500 | 0.956 | 0.032 | 0.966 |
| 2006 | Alt. isoform/cryptic donor    | CACTTTCTTGgtcgagcga   | 6.544  | 0.529 | 0.958 | 0.031 | 0.968 |
| 2125 | Alt. isoform/cryptic acceptor | gtacatccagGATTCTGTGC  | 6.304  | 0.514 | 0.555 | 0.432 | 0.222 |
| 2205 | Alt. isoform/cryptic acceptor | accactacagCGAGGACATG  | 4.878  | 0.457 | 0.847 | 0.147 | 0.827 |
| 2230 | Alt. isoform/cryptic acceptor | gttctcaagGGTTTGATGG   | 2.346  | 0.471 | 0.692 | 0.290 | 0.580 |
| 2321 | Constitutive acceptor         | gcttcaagGCGACGGTAT    | 6.287  | 0.457 | 0.385 | 0.587 | 0.344 |
| 2326 | Alt. isoform/cryptic donor    | AAAGGCGACGgtatgaacac  | 7.959  | 0.486 | 0.760 | 0.181 | 0.761 |
| 2487 | Constitutive donor            | GCTTAACCAggtgaggettc  | 14.109 | 0.500 | 0.246 | 0.676 | 0.637 |
| 2512 | Alt. isoform/cryptic acceptor | actgttcaagACCCCTTCTA  | 4.626  | 0.514 | 0.933 | 0.062 | 0.933 |
| 2523 | Alt. isoform/cryptic donor    | CCCTTCTAAGgtgccagttt  | 10.939 | 0.471 | 0.614 | 0.306 | 0.501 |
| 2545 | Alt. isoform/cryptic acceptor | cttegccagTTCAGCAAAA   | 6.490  | 0.529 | 0.692 | 0.300 | 0.566 |
| 2550 | Alt. isoform/cryptic acceptor | cccagttcagCAAAAAGGCC  | 4.578  | 0.500 | 0.800 | 0.194 | 0.758 |
| 2601 | Alt. isoform/cryptic donor    | CATTGAGAAAGtcaacgtgt  | 6.294  | 0.500 | 0.944 | 0.041 | 0.956 |
| 2664 | Constitutive acceptor         | tgttctccagCGTGATGATT  | 6.507  | 0.486 | 0.462 | 0.524 | 0.117 |
| 2720 | Alt. isoform/cryptic donor    | ACTTCATGAGgtacgtggt   | 9.451  | 0.543 | 0.706 | 0.226 | 0.680 |
| 2765 | Alt. isoform/cryptic donor    | ACATCAAAGAgtacatccgg  | 4.583  | 0.500 | 0.944 | 0.041 | 0.956 |
| 2942 | Constitutive donor            | TGAACATCAAggtgccctatt | 6.540  | 0.500 | 0.357 | 0.573 | 0.378 |
| 3217 | Alt. isoform/cryptic donor    | TACTACCTGGtaacatcga   | 6.561  | 0.500 | 0.885 | 0.083 | 0.906 |
| 3292 | Alt. isoform/cryptic acceptor | gtgetacaagATCTTACCC   | 3.251  | 0.514 | 0.960 | 0.038 | 0.961 |
| 3307 | Alt. isoform/cryptic acceptor | taccctgaagTCCAGTAAGA  | 3.209  | 0.500 | 0.930 | 0.067 | 0.928 |
| 3310 | Alt. isoform/cryptic donor    | CTGAAGTCCAgtaagaagtg  | 9.173  | 0.471 | 0.712 | 0.218 | 0.694 |
| 3370 | Constitutive acceptor         | gtgcctgcagAACGCAAAGA  | 3.539  | 0.500 | 0.477 | 0.500 | 0.047 |
| 3557 | Alt. isoform/cryptic donor    | CCGTGGGAAAgctctgtgact | 6.027  | 0.500 | 0.919 | 0.059 | 0.935 |
| 3642 | Alt. isoform/cryptic donor    | TCGGAAACAACgtgacctgac | 5.533  | 0.500 | 0.919 | 0.061 | 0.934 |
| 3666 | unclassified donor            | GTCTAAGAAGgtgagcgagg  | 13.918 | 0.500 | 0.418 | 0.490 | 0.000 |
| 3745 | Alt. isoform/cryptic donor    | ATGAACCTTGtaagggttac  | 11.753 | 0.500 | 0.609 | 0.303 | 0.502 |
| 3751 | Alt. isoform/cryptic donor    | CTTGTAAGGgtactgaggg   | 6.065  | 0.500 | 0.952 | 0.033 | 0.966 |
| 3784 | Constitutive acceptor         | cttcttgcagATGCTTGAGT  | 7.888  | 0.514 | 0.201 | 0.782 | 0.742 |
| 3816 | Alt. isoform/cryptic donor    | GGCCAAGAATgtgacctggtt | 6.207  | 0.543 | 0.936 | 0.047 | 0.950 |

|      |                               |                       |        |       |       |       |       |
|------|-------------------------------|-----------------------|--------|-------|-------|-------|-------|
| 3840 | Alt. isoform/cryptic donor    | GGATTCCTCgtgagcgtgt   | 5.915  | 0.514 | 0.899 | 0.079 | 0.912 |
| 3880 | Alt. isoform/cryptic donor    | AAGACCGACCgtgagatcta  | 5.588  | 0.457 | 0.542 | 0.380 | 0.299 |
| 3906 | Alt. isoform/cryptic donor    | GAGCATGAAGgtgaagatga  | 8.763  | 0.500 | 0.560 | 0.358 | 0.361 |
| 4023 | Alt. isoform/cryptic acceptor | ctacccttagCCTGGACACC  | 6.193  | 0.514 | 0.626 | 0.365 | 0.416 |
| 4136 | Alt. isoform/cryptic donor    | TGACCTACAAGtacgtgctg  | 9.678  | 0.500 | 0.596 | 0.323 | 0.459 |
| 4211 | Alt. isoform/cryptic donor    | GCATTCTGATgtacgtgaag  | 7.123  | 0.514 | 0.847 | 0.112 | 0.868 |
| 4230 | Alt. isoform/cryptic donor    | GCTGAAGAAAgtgtgcatcc  | 6.203  | 0.529 | 0.934 | 0.048 | 0.949 |
| 4266 | Alt. isoform/cryptic acceptor | tgaaccttagGAAGGCTCAG  | 7.185  | 0.457 | 0.849 | 0.138 | 0.837 |
| 4306 | Alt. isoform/cryptic donor    | ACCGCTATTGtgtctgctgac | 5.056  | 0.529 | 0.865 | 0.097 | 0.888 |
| 4344 | Alt. isoform/cryptic donor    | CACTTACCCGgtgtctatga  | 6.061  | 0.514 | 0.900 | 0.077 | 0.914 |
| 4366 | Alt. isoform/cryptic donor    | TGGCTGCAGGgtaacctgaa  | 6.041  | 0.500 | 0.750 | 0.183 | 0.755 |
| 4414 | Alt. isoform/cryptic acceptor | cgctatgaagGCTTACCACA  | 3.152  | 0.514 | 0.945 | 0.052 | 0.945 |
| 4459 | Alt. isoform/cryptic acceptor | cgactttagACCCGGTGGGA  | 3.313  | 0.500 | 0.787 | 0.200 | 0.746 |
| 4510 | Constitutive donor            | ATCGCTTCAGgtgaggttga  | 11.745 | 0.500 | 0.262 | 0.665 | 0.607 |
| 4511 | Constitutive acceptor         | atcgcttagGTGAGGTGA    | 6.293  | 0.529 | 0.441 | 0.541 | 0.185 |
| 4701 | Constitutive acceptor         | ttactgcagGCATCTTGCT   | 8.159  | 0.514 | 0.411 | 0.576 | 0.288 |
| 4773 | Alt. isoform/cryptic donor    | GTCTATCCACgtgaccatgt  | 6.070  | 0.529 | 0.520 | 0.403 | 0.224 |
| 4809 | Alt. isoform/cryptic donor    | CCCTAATGAGgtgatccctt  | 6.780  | 0.529 | 0.856 | 0.106 | 0.877 |
| 4873 | Alt. isoform/cryptic donor    | ATGCTGCCTGgtgaggtgaa  | 9.597  | 0.529 | 0.762 | 0.188 | 0.753 |
| 4878 | Alt. isoform/cryptic donor    | GCCTGGTGAGgtgaacgaca  | 5.312  | 0.500 | 0.940 | 0.044 | 0.953 |
| 5001 | Alt. isoform/cryptic acceptor | tgggccccagCAGCAACGAC  | 4.531  | 0.529 | 0.765 | 0.227 | 0.703 |
| 5004 | Alt. isoform/cryptic acceptor | gccccagcagCAACGACCAG  | 3.016  | 0.529 | 0.837 | 0.157 | 0.813 |
| 5067 | Alt. isoform/cryptic donor    | CCTGGAAGAGgtgaagact   | 8.199  | 0.514 | 0.764 | 0.180 | 0.764 |
| 5104 | Alt. isoform/cryptic acceptor | ttacctgcagATGAGGTTC   | 11.438 | 0.514 | 0.591 | 0.398 | 0.325 |
| 5140 | Alt. isoform/cryptic donor    | TACGAGAAGGgtactctgga  | 5.097  | 0.471 | 0.916 | 0.059 | 0.936 |
| 5263 | Alt. isoform/cryptic acceptor | getgaccagATCATCAAGC   | 2.350  | 0.557 | 0.593 | 0.388 | 0.345 |
| 5416 | Alt. isoform/cryptic donor    | ATCCTCGAGGgtgatgagct  | 5.258  | 0.471 | 0.829 | 0.126 | 0.848 |
| 5542 | Alt. isoform/cryptic acceptor | gctgtctcagCTGTTCATGT  | 8.742  | 0.500 | 0.683 | 0.304 | 0.555 |
| 5549 | Alt. isoform/cryptic donor    | AGCTGTTCATgtacacctet  | 5.135  | 0.514 | 0.868 | 0.098 | 0.887 |
| 5569 | Alt. isoform/cryptic acceptor | tccgtetaagAGGAACCAGC  | 3.653  | 0.514 | 0.927 | 0.070 | 0.924 |
| 5616 | Alt. isoform/cryptic acceptor | ctcttagagGGTGTGAGA    | 3.796  | 0.486 | 0.802 | 0.185 | 0.769 |
| 5616 | Alt. isoform/cryptic donor    | TCTTGATAGgtgtttgagat  | 4.789  | 0.457 | 0.911 | 0.062 | 0.931 |
| 5668 | Alt. isoform/cryptic acceptor | taccgtaagATGACCTATG   | 4.339  | 0.500 | 0.796 | 0.196 | 0.754 |

|      |                               |                       |        |       |       |       |       |
|------|-------------------------------|-----------------------|--------|-------|-------|-------|-------|
| 5730 | Alt. isoform/cryptic acceptor | atctegacagCTACTGCAGC  | 3.975  | 0.414 | 0.845 | 0.148 | 0.825 |
| 5829 | Alt. isoform/cryptic acceptor | gcgagtctagGAAGCGGGAC  | 4.419  | 0.486 | 0.590 | 0.389 | 0.340 |
| 5863 | Alt. isoform/cryptic acceptor | ttggtccagACTGAGAAGT   | 7.317  | 0.543 | 0.600 | 0.390 | 0.350 |
| 5921 | Alt. isoform/cryptic donor    | TGCATGCTGTgtacgggtct  | 4.883  | 0.500 | 0.957 | 0.031 | 0.968 |
| 6139 | Alt. isoform/cryptic acceptor | cgctgctcagAACAGGCTCC  | 2.442  | 0.529 | 0.816 | 0.176 | 0.784 |
| 6199 | Alt. isoform/cryptic acceptor | ctactccaagTTC AATCTTG | 4.578  | 0.529 | 0.930 | 0.066 | 0.929 |
| 6213 | Alt. isoform/cryptic acceptor | atcttggcagGGGCTTCATC  | 4.671  | 0.500 | 0.678 | 0.310 | 0.543 |
| 6258 | Alt. isoform/cryptic acceptor | ccatctacagCAAAGAGGAA  | 4.973  | 0.500 | 0.822 | 0.171 | 0.793 |
| 6337 | Alt. isoform/cryptic acceptor | ctctgcacagCAGGATATGA  | 3.577  | 0.529 | 0.610 | 0.372 | 0.390 |
| 6340 | Alt. isoform/cryptic acceptor | tgcacagcagGATATGAACC  | 5.307  | 0.543 | 0.575 | 0.395 | 0.313 |
| 6420 | Alt. isoform/cryptic acceptor | ccatcaccagAGAGGACATC  | 2.479  | 0.514 | 0.962 | 0.036 | 0.963 |
| 6445 | Constitutive acceptor         | cattctccagAACGTGTGCC  | 9.539  | 0.500 | 0.209 | 0.784 | 0.733 |
| 6624 | Constitutive acceptor         | gctctcatagGACCCTGGAT  | 10.048 | 0.500 | 0.176 | 0.817 | 0.784 |
| 6654 | Alt. isoform/cryptic acceptor | gttacatcagGCGGTCCGAT  | 3.376  | 0.500 | 0.765 | 0.221 | 0.712 |
| 6663 | Alt. isoform/cryptic donor    | GCGGTCCGATgtgagatacg  | 6.227  | 0.486 | 0.936 | 0.047 | 0.950 |
| 6722 | Alt. isoform/cryptic donor    | GCGGAACCATgtacaagatt  | 5.221  | 0.514 | 0.960 | 0.028 | 0.971 |
| 6763 | Alt. isoform/cryptic acceptor | ctacgtgcagTTGATCGCAT  | 5.764  | 0.529 | 0.844 | 0.148 | 0.824 |
| 6801 | Constitutive acceptor         | tgtctcttagGACCCCTTTC  | 5.629  | 0.514 | 0.255 | 0.731 | 0.652 |
| 6850 | Alt. isoform/cryptic donor    | GACACCTACCgtgagtecat  | 8.138  | 0.443 | 0.627 | 0.307 | 0.511 |
| 6894 | Alt. isoform/cryptic donor    | GTTGACAAGgtcaacatta   | 6.897  | 0.471 | 0.855 | 0.108 | 0.874 |
| 6895 | Alt. isoform/cryptic acceptor | gttcgacaagGTCAACATTA  | 2.380  | 0.486 | 0.870 | 0.126 | 0.855 |
| 6943 | Alt. isoform/cryptic donor    | CTCGAGCCAGgtgatgcttg  | 8.185  | 0.486 | 0.833 | 0.125 | 0.850 |
| 6944 | Alt. isoform/cryptic acceptor | ctcgagccagGTGATGCTTG  | 5.597  | 0.457 | 0.761 | 0.232 | 0.696 |
| 6960 | Constitutive acceptor         | cttgcatagGATGACCACC   | 2.622  | 0.471 | 0.452 | 0.510 | 0.115 |
| 6990 | unclassified donor            | GATCGTCAAgttaacgcca   | 6.349  | 0.471 | 0.500 | 0.414 | 0.000 |
| 7038 | Alt. isoform/cryptic donor    | TAAGCTGGTgtgaagatta   | 5.500  | 0.471 | 0.942 | 0.041 | 0.957 |
| 7071 | Alt. isoform/cryptic donor    | GAACCTCCGACgtgtgggaca | 4.732  | 0.543 | 0.918 | 0.059 | 0.936 |
| 7124 | Alt. isoform/cryptic acceptor | cttctgaagTTGGTGAGTG   | 3.877  | 0.543 | 0.743 | 0.247 | 0.667 |
| 7126 | Alt. isoform/cryptic donor    | CCTGAAGTTgtgagtgtct   | 12.153 | 0.500 | 0.727 | 0.210 | 0.711 |
| 7242 | Alt. isoform/cryptic acceptor | gcaacctcagCCAGCAGATC  | 3.540  | 0.500 | 0.601 | 0.379 | 0.370 |
| 7355 | Alt. isoform/cryptic donor    | GCGTGAAGAgtaagactec   | 4.790  | 0.514 | 0.943 | 0.040 | 0.957 |
| 7464 | Alt. isoform/cryptic acceptor | cactgttcagCGAGATCGTG  | 6.043  | 0.529 | 0.637 | 0.349 | 0.453 |
| 7535 | Alt. isoform/cryptic donor    | TGATGCTGAAgtactctctg  | 4.763  | 0.529 | 0.907 | 0.069 | 0.924 |

|      |                               |                       |       |       |       |       |       |
|------|-------------------------------|-----------------------|-------|-------|-------|-------|-------|
| 7585 | Alt. isoform/cryptic donor    | AGAGCTACTGgtatgcacgc  | 9.638 | 0.500 | 0.752 | 0.188 | 0.750 |
| 7648 | Alt. isoform/cryptic donor    | AACCTGCTGGgtatgatta   | 7.568 | 0.500 | 0.698 | 0.229 | 0.672 |
| 7722 | Alt. isoform/cryptic acceptor | ccagccttagGAATGTGCTG  | 3.055 | 0.500 | 0.807 | 0.185 | 0.771 |
| 7758 | Alt. isoform/cryptic acceptor | cttcggeagCCGGATCAGG   | 6.039 | 0.514 | 0.607 | 0.379 | 0.375 |
| 7792 | Alt. isoform/cryptic acceptor | ggatctgagAACCAACCTTA  | 3.876 | 0.514 | 0.696 | 0.289 | 0.586 |
| 7922 | Alt. isoform/cryptic donor    | AGATGGACAGgtccgatgaa  | 6.684 | 0.514 | 0.941 | 0.042 | 0.955 |
| 7968 | Constitutive acceptor         | atgtccttagGTTGGACGAG  | 2.272 | 0.529 | 0.343 | 0.637 | 0.461 |
| 8169 | Alt. isoform/cryptic acceptor | ctaccgacagGCTTGGTAGG  | 8.327 | 0.529 | 0.960 | 0.038 | 0.961 |
| 8173 | Alt. isoform/cryptic donor    | GACAGGCTTGtagctctc    | 8.257 | 0.486 | 0.774 | 0.169 | 0.782 |
| 8205 | Alt. isoform/cryptic donor    | TGCTCTAAGgtgtaccca    | 6.332 | 0.514 | 0.932 | 0.049 | 0.948 |
| 8206 | Alt. isoform/cryptic acceptor | tgetcttaagGTGTACGCCA  | 5.395 | 0.514 | 0.524 | 0.455 | 0.133 |
| 8331 | Alt. isoform/cryptic acceptor | tgagcggcagGGTGAAGAAG  | 5.008 | 0.514 | 0.856 | 0.139 | 0.838 |
| 8353 | Alt. isoform/cryptic acceptor | tcttattcagTTGAGGGACG  | 2.472 | 0.500 | 0.856 | 0.133 | 0.845 |
| 8418 | Alt. isoform/cryptic acceptor | acttccttagCAGGCACCCCT | 2.679 | 0.500 | 0.944 | 0.052 | 0.945 |
| 8421 | Alt. isoform/cryptic acceptor | tccttagcagGCACCCCTTT  | 6.406 | 0.514 | 0.782 | 0.208 | 0.734 |
| 8459 | Alt. isoform/cryptic donor    | TGTACGGCCGgtacacctac  | 4.997 | 0.471 | 0.903 | 0.074 | 0.918 |
| 8472 | Alt. isoform/cryptic acceptor | acacctacagCGATATCAAC  | 3.154 | 0.543 | 0.614 | 0.363 | 0.409 |
| 8497 | Alt. isoform/cryptic acceptor | catcatgagACCCGGGAAA   | 2.271 | 0.471 | 0.944 | 0.053 | 0.944 |
| 8521 | Constitutive acceptor         | cctctetaagATCTCCGAGT  | 5.017 | 0.500 | 0.424 | 0.562 | 0.245 |
| 8538 | Alt. isoform/cryptic donor    | GTTGGATGAGgtgtgga     | 4.678 | 0.529 | 0.945 | 0.039 | 0.958 |
| 8583 | Constitutive acceptor         | cttaccttagGGGCGAAGAG  | 8.039 | 0.486 | 0.196 | 0.792 | 0.753 |

The putative intron splicing sites of wild-type RdRp gene sequence was predicted by Alternative Splice Site

Predictor (ASSP) (<http://wangcomputing.com/assp/>).

\* Scores of the preprocessing models reflecting splice site strength, i.e. a PSSM for putative acceptor sites, and an MDD model for putative donor sites. Intron GC values correspond to 70 nt of the neighboring intron.

\*\* Activations are output values of the backpropagation networks used for classification. High values for one class with low values of the other class imply a good classification. Confidence is a simple measure expressing the differences between output activations. Confidence ranges between zero (undecided) to one (perfect classification).

**Table S2. The predicted intron splicing sites of wild-type GP gene.**

| Position (bp) | Putative splice site          | Sequence              | Score* | Intron GC* | Activations** |              | Confidence** |
|---------------|-------------------------------|-----------------------|--------|------------|---------------|--------------|--------------|
|               |                               |                       |        |            | Alt./Cryptic  | Constitutive |              |
| 36            | unclassified donor            | GGTGGTGAAGgtgagcctgt  | 13.078 | 0.514      | 0.408         | 0.496        | 0.000        |
| 93            | Constitutive acceptor         | ttatttcagGGCTACCGAC   | 11.782 | 0.500      | 0.182         | 0.810        | 0.775        |
| 183           | Alt. isoform/cryptic acceptor | ccgctgetagCATTACGCGG  | 3.056  | 0.500      | 0.929         | 0.067        | 0.928        |
| 259           | Alt. isoform/cryptic donor    | AGGCAGATTCgtgaggaaga  | 4.761  | 0.500      | 0.860         | 0.108        | 0.875        |
| 297           | Alt. isoform/cryptic acceptor | tcgctggcagCACTACCCAG  | 5.498  | 0.514      | 0.952         | 0.046        | 0.952        |
| 318           | Alt. isoform/cryptic donor    | GATTATCTCCgttagcgacc  | 4.792  | 0.529      | 0.928         | 0.056        | 0.940        |
| 324           | Alt. isoform/cryptic acceptor | tctccgtagCGACCTGCCT   | 2.244  | 0.471      | 0.679         | 0.308        | 0.547        |
| 364           | Alt. isoform/cryptic acceptor | atctctgaagTGCAGAGATCA | 3.458  | 0.500      | 0.845         | 0.145        | 0.828        |
| 405           | Alt. isoform/cryptic donor    | TACTACCAGgtcgagaaca   | 5.199  | 0.529      | 0.954         | 0.034        | 0.965        |
| 406           | Alt. isoform/cryptic acceptor | ttactaccagGTCGAGAACA  | 5.238  | 0.500      | 0.592         | 0.383        | 0.354        |
| 437           | Alt. isoform/cryptic donor    | ACTCTTGGGTgtcagattct  | 4.710  | 0.529      | 0.923         | 0.057        | 0.938        |
| 443           | Alt. isoform/cryptic acceptor | tgcgtgtagATTCTGCTGA   | 5.120  | 0.514      | 0.630         | 0.357        | 0.433        |
| 504           | Alt. isoform/cryptic donor    | GTTCTCTAAGgtgccagtga  | 9.430  | 0.500      | 0.831         | 0.124        | 0.851        |
| 529           | Alt. isoform/cryptic acceptor | tatcaccaagCTGGACAACA  | 2.328  | 0.500      | 0.853         | 0.139        | 0.837        |
| 552           | Alt. isoform/cryptic donor    | GCACTTCTCTgtggcacca   | 6.302  | 0.514      | 0.893         | 0.079        | 0.912        |
| 592           | Constitutive acceptor         | tctgaccagGACAACCTACC  | 3.778  | 0.543      | 0.341         | 0.630        | 0.460        |
| 649           | Alt. isoform/cryptic acceptor | gtctctcagACCGTTAAGC   | 6.880  | 0.529      | 0.693         | 0.295        | 0.574        |
| 708           | Alt. isoform/cryptic donor    | CCCGTATACCgtgagcatta  | 8.383  | 0.514      | 0.655         | 0.278        | 0.576        |
| 728           | Constitutive acceptor         | acctctccagAGAAGATCAT  | 6.756  | 0.514      | 0.388         | 0.598        | 0.352        |
| 780           | Alt. isoform/cryptic donor    | TGAGCACAAGgtgatctcat  | 9.170  | 0.514      | 0.526         | 0.387        | 0.264        |
| 824           | Alt. isoform/cryptic acceptor | ttaccegaagAGATGCTGGA  | 3.783  | 0.529      | 0.805         | 0.185        | 0.770        |
| 835           | Alt. isoform/cryptic donor    | ATGCTGGATGgtgagcacia  | 9.886  | 0.514      | 0.525         | 0.389        | 0.260        |
| 894           | Alt. isoform/cryptic donor    | CAACAAGCGTgtgaggact   | 8.781  | 0.500      | 0.825         | 0.132        | 0.840        |
| 914           | Alt. isoform/cryptic donor    | GCATCATCAAgtagcaag    | 6.287  | 0.514      | 0.880         | 0.089        | 0.899        |
| 969           | Constitutive acceptor         | cttgattagGCTGATCCTG   | 5.033  | 0.486      | 0.190         | 0.798        | 0.761        |
| 1008          | Constitutive acceptor         | tcctattagATGGCTGGTG   | 7.158  | 0.500      | 0.176         | 0.808        | 0.782        |
| 1046          | Alt. isoform/cryptic donor    | TTTTCTGTGgtacgatctg   | 8.598  | 0.486      | 0.789         | 0.158        | 0.800        |
| 1106          | Alt. isoform/cryptic donor    | GCCTGTGGAAGtagcttccg  | 5.205  | 0.500      | 0.934         | 0.049        | 0.948        |
| 1123          | Alt. isoform/cryptic acceptor | tcggtcaagTGCAGCAACT   | 4.432  | 0.471      | 0.799         | 0.192        | 0.760        |
| 1128          | Alt. isoform/cryptic acceptor | teaagtgcagCAACTGCGGC  | 3.238  | 0.486      | 0.858         | 0.136        | 0.842        |

|      |                               |                      |        |       |       |       |       |
|------|-------------------------------|----------------------|--------|-------|-------|-------|-------|
| 1328 | Alt. isoform/cryptic donor    | GCCTGCTTAAgttcgtgacc | 5.154  | 0.514 | 0.929 | 0.051 | 0.945 |
| 1356 | Alt. isoform/cryptic donor    | GATCGGTCTGgtgatcetta | 4.853  | 0.486 | 0.642 | 0.284 | 0.558 |
| 1368 | Alt. isoform/cryptic acceptor | tgatccttagCCAGATGCCT | 2.891  | 0.500 | 0.795 | 0.198 | 0.751 |
| 1372 | Alt. isoform/cryptic acceptor | ccttagccagATGCCTATGT | 3.041  | 0.529 | 0.730 | 0.259 | 0.646 |
| 1443 | Alt. isoform/cryptic donor    | CCCTGTGCTGgtgaccteta | 6.777  | 0.471 | 0.866 | 0.100 | 0.884 |
| 1463 | Alt. isoform/cryptic donor    | AGTTTGAAAgtgcctcgag  | 5.015  | 0.543 | 0.964 | 0.026 | 0.973 |
| 1631 | Alt. isoform/cryptic donor    | TGGGCTGCGAgtagctggac | 4.582  | 0.500 | 0.967 | 0.024 | 0.975 |
| 1783 | Alt. isoform/cryptic donor    | AAGATCAGCGgtatgatgc  | 7.260  | 0.529 | 0.671 | 0.262 | 0.610 |
| 1795 | Alt. isoform/cryptic donor    | ATGATCGCTGgtgacagcct | 7.023  | 0.500 | 0.803 | 0.149 | 0.814 |
| 1883 | Alt. isoform/cryptic donor    | TGGATGGCAAgtagcggat  | 5.025  | 0.500 | 0.926 | 0.053 | 0.943 |
| 1889 | Alt. isoform/cryptic donor    | GCAAGTACCGgtataggtt  | 5.618  | 0.486 | 0.814 | 0.135 | 0.834 |
| 1992 | Alt. isoform/cryptic donor    | CATCAAGAGCgtgggcatcc | 5.600  | 0.514 | 0.825 | 0.138 | 0.833 |
| 2010 | Alt. isoform/cryptic donor    | CCACTACGAGgtgtcagaga | 7.706  | 0.500 | 0.765 | 0.178 | 0.767 |
| 2044 | Alt. isoform/cryptic acceptor | tcctattcagTCTACCCACA | 4.199  | 0.514 | 0.801 | 0.186 | 0.768 |
| 2077 | Constitutive donor            | ACCTGCACCGgtaattgcga | 7.342  | 0.500 | 0.414 | 0.502 | 0.176 |
| 2097 | Alt. isoform/cryptic acceptor | atactgcagAAAGAACCAG  | 4.833  | 0.529 | 0.869 | 0.122 | 0.860 |
| 2125 | Constitutive acceptor         | aggcttcagGACTTCTGCA  | 3.662  | 0.500 | 0.451 | 0.529 | 0.148 |
| 2191 | Alt. isoform/cryptic donor    | ATTAACGAGGgtgctacttg | 4.511  | 0.529 | 0.955 | 0.033 | 0.966 |
| 2253 | Alt. isoform/cryptic acceptor | ggatctacagCGTGCTGAAG | 3.191  | 0.514 | 0.910 | 0.086 | 0.906 |
| 2280 | Alt. isoform/cryptic donor    | CGTTGCCGACgtgtgcatct | 6.880  | 0.514 | 0.904 | 0.073 | 0.919 |
| 2331 | Alt. isoform/cryptic donor    | TACCGAAGAGgttccatacg | 4.991  | 0.500 | 0.959 | 0.029 | 0.970 |
| 2359 | Constitutive acceptor         | tctgtccagGCTGATATTC  | 5.600  | 0.514 | 0.373 | 0.611 | 0.389 |
| 2401 | Alt. isoform/cryptic donor    | ATCACCATTGgtgagettat | 11.534 | 0.529 | 0.522 | 0.395 | 0.242 |
| 2443 | Alt. isoform/cryptic donor    | ATCTACTCCGgtaacattgc | 9.301  | 0.529 | 0.591 | 0.337 | 0.430 |
| 2469 | Alt. isoform/cryptic donor    | GAACGACCCGgtgaagatgt | 5.862  | 0.500 | 0.788 | 0.167 | 0.788 |
| 2494 | Alt. isoform/cryptic acceptor | tcatcctcagCTTACTCATG | 6.466  | 0.514 | 0.705 | 0.287 | 0.594 |
| 2618 | Alt. isoform/cryptic donor    | ACACTTACAGgttcaggtct | 7.293  | 0.500 | 0.904 | 0.068 | 0.925 |
| 2619 | Alt. isoform/cryptic acceptor | acacttacagGTTCAGGTCT | 5.949  | 0.500 | 0.773 | 0.215 | 0.722 |
| 2624 | Alt. isoform/cryptic donor    | ACAGTTTACAGgtctgtctt | 8.772  | 0.486 | 0.925 | 0.054 | 0.942 |
| 2625 | Alt. isoform/cryptic acceptor | acaggttcagGTCTGGTCTT | 3.359  | 0.514 | 0.684 | 0.296 | 0.567 |
| 2641 | Alt. isoform/cryptic acceptor | tcttgagcagATCTCTGACA | 4.449  | 0.529 | 0.945 | 0.051 | 0.946 |
| 2661 | Alt. isoform/cryptic acceptor | tccecatcagCTTCAAGGAC | 3.473  | 0.514 | 0.769 | 0.222 | 0.711 |
| 2668 | Alt. isoform/cryptic acceptor | cagettcaagGACTTCAGCT | 3.339  | 0.514 | 0.785 | 0.206 | 0.737 |



|      |                               |                      |       |       |       |       |       |
|------|-------------------------------|----------------------|-------|-------|-------|-------|-------|
| 2676 | Alt. isoform/cryptic acceptor | aggacttcagCTCATTCTTC | 2.357 | 0.500 | 0.795 | 0.197 | 0.753 |
| 2751 | Alt. isoform/cryptic donor    | TCTTTTCAAGgttgcaacta | 5.168 | 0.529 | 0.935 | 0.047 | 0.950 |
| 2752 | Alt. isoform/cryptic acceptor | tctttcaagGTTGCACCTA  | 3.558 | 0.500 | 0.699 | 0.281 | 0.598 |
| 2787 | Constitutive acceptor         | cttctactagGCTTAACTGC | 5.710 | 0.500 | 0.455 | 0.528 | 0.138 |
| 2815 | Alt. isoform/cryptic donor    | CTTCTTTGTGgtcaggcct  | 9.649 | 0.529 | 0.757 | 0.184 | 0.757 |
| 2821 | Alt. isoform/cryptic acceptor | ttgtggtcagGGCCTTCTT  | 6.984 | 0.529 | 0.502 | 0.483 | 0.039 |
| 2865 | Alt. isoform/cryptic acceptor | tgaccttcagCACCGCCATC | 4.796 | 0.529 | 0.876 | 0.117 | 0.867 |
| 2908 | Alt. isoform/cryptic acceptor | tacctaccagCTGGCTGTGA | 6.831 | 0.500 | 0.696 | 0.293 | 0.579 |
| 2933 | Alt. isoform/cryptic donor    | GCAGCAACAAGtacaacatc | 6.089 | 0.500 | 0.851 | 0.108 | 0.873 |
| 2958 | Alt. isoform/cryptic acceptor | tgttctgcagCGCAAACCCG | 4.988 | 0.500 | 0.635 | 0.350 | 0.448 |
| 3021 | Alt. isoform/cryptic donor    | TTCTGTTGAGgtgctcgtga | 5.200 | 0.514 | 0.963 | 0.028 | 0.971 |
| 3146 | Alt. isoform/cryptic donor    | ATTACATCAAGtcccgcttc | 5.088 | 0.500 | 0.945 | 0.041 | 0.956 |
| 3171 | Alt. isoform/cryptic acceptor | tcattgccagCTACTTCGGC | 3.870 | 0.471 | 0.816 | 0.173 | 0.788 |
| 3183 | Alt. isoform/cryptic acceptor | acttgcagCTTCTTCGAT   | 3.003 | 0.486 | 0.868 | 0.128 | 0.853 |
| 3201 | Alt. isoform/cryptic acceptor | atacaatcagGGTGATCCTG | 2.559 | 0.471 | 0.787 | 0.200 | 0.745 |
| 3201 | Alt. isoform/cryptic donor    | TACAATCAGGgtgatcctgc | 5.357 | 0.500 | 0.829 | 0.130 | 0.843 |
| 3249 | Alt. isoform/cryptic acceptor | acttctgcagCATCCTGACC | 7.746 | 0.471 | 0.516 | 0.472 | 0.086 |

The putative intron splicing sites of wild type GP gene sequence was predicted by ASSP).

\* Scores of the preprocessing models reflecting splice site strength, i.e. a PSSM for putative acceptor sites, and an MDD model for putative donor sites. Intron GC values correspond to 70 nt of the neighboring intron.

\*\* Activations are output values of the backpropagation networks used for classification. High values for one class with low values of the other class imply a good classification. Confidence is a simple measure expressing the differences between output activations. Confidence ranges between zero (undecided) to one (perfect classification).

**Table S3. List of primers used in the study.**

| Construct                                                           | Abbreviation          | Primer sequence (5' to 3')                                                  | Purpose                                                                           |
|---------------------------------------------------------------------|-----------------------|-----------------------------------------------------------------------------|-----------------------------------------------------------------------------------|
| p2300-N                                                             | N                     | <b>F:</b> GGGGTACCATGTCTAAGGTTAAGCTC                                        | To amplify TSWV N and cloned into p2300S                                          |
|                                                                     |                       | A                                                                           |                                                                                   |
|                                                                     |                       | <b>R:</b> ACGTCGACTTAAGCAAGTTCTGCAA<br>GTTTGG                               |                                                                                   |
| p2300-RdRp <sup>wt</sup>                                            | RdRp <sup>wt</sup>    | <b>F:</b> CGGGATCCATGAACATCCAGAAAATA                                        | To amplify TSWV wild-type RdRp and cloned into p2300S                             |
|                                                                     |                       | C                                                                           |                                                                                   |
|                                                                     |                       | <b>R:</b> GACGTCGACTTAATCCGTGCTTCTT<br>CTTC                                 |                                                                                   |
| p2300-RdRp <sup>opt</sup>                                           | RdRp <sup>opt</sup>   | <b>F:</b> CTCGGTACCATGAACATTCAGAAGAT<br>CCAAAAGC                            | To amplify TSWV optimized RdRp and cloned into p2300S                             |
|                                                                     |                       | <b>R:</b> GACTCTAGACTAATCGGTGCTCCTT<br>CCTC                                 |                                                                                   |
|                                                                     |                       |                                                                             |                                                                                   |
| pCXSN-NSs                                                           | NSs                   | <b>F:</b> CTCGGTACCATGTCTTCAAGTGTTA<br>TGAG                                 | To amplify TSWV NSs and cloned into pCXSN                                         |
|                                                                     |                       | <b>R:</b> GACTCTAGATTATTTGATCCTGAAGC<br>ATATG                               |                                                                                   |
|                                                                     |                       |                                                                             |                                                                                   |
| pCB301-HH-S <sub>(-)</sub> -RZ-NOS                                  | S <sub>(-)</sub>      | <b>F:</b> CGAAAACCCGGTATCCCGGGTTCAG<br>AGCAATTGTGCATAATTTTATTTC             | To amplify the TSWV genomic RNA sequence for construction of S <sub>(-)</sub>     |
|                                                                     |                       | <b>R:</b> GGTGGAGATGCCATGCCGACCCAGA<br>GCAATTGTGTCAATTTTATTCAAAC            |                                                                                   |
|                                                                     |                       | <b>F:</b> GTTTGAATAAAAATTGACACAATTGCT<br>CTGGGTCGGCATGGCATCTCCACC           |                                                                                   |
| <b>R:</b> GAATAAAAATTATGACACAATTGCTCT<br>GAACCCGGGATACCGGGTTTTTCG   |                       |                                                                             |                                                                                   |
| pCB301-HH-S <sub>(+)</sub> -RZ-NOS                                  | S <sub>(+)</sub>      | <b>F:</b> CGAAAACCCGGTATCCCGGGTTCAG<br>AGCAATTGTGCATAATTTTATTCAAAC          | To amplify the TSWV antigenomic RNA sequence for construction of S <sub>(+)</sub> |
|                                                                     |                       | <b>R:</b> GGTGGAGATGCCATGCCGACCCAGA<br>GCAATTGTGCATAATTTTATTCTTA            |                                                                                   |
|                                                                     |                       | <b>F:</b> GAATAAAAATTATGACACAATTGCTCT<br>GGGTCGGCATGGCATCTC                 |                                                                                   |
| <b>R:</b> GTTTGAATAAAAATTGACACAATTGCT<br>CTGAACCCGGGATACCGGGTTTTTCG |                       |                                                                             |                                                                                   |
| pCB301-HH-S <sub>(-)eGFP</sub> -RZ-NOS                              | SR <sub>(-)eGFP</sub> | <b>F:</b> GCTTTTTTATAATTTAACTTACAAC<br>GCTTTTACTTGTACAGCTCGTCCATGCC<br>GAGA | To amplify the eGFP for construction of SR <sub>(-)eGFP</sub>                     |
|                                                                     |                       | <b>R:</b> GTCAAAGCATATAACAATTCTACG<br>ATCATCATGGTGAGCAAGGGCGAGGAG<br>CTGTTC |                                                                                   |
|                                                                     |                       | <b>F:</b> GAACAGCTCCTCGCCCTTGCTCACC                                         |                                                                                   |

|                                                    |                                      |                                                                                                                                                                                                                                                                                                                                             |                                                                                                                                                                                                         |
|----------------------------------------------------|--------------------------------------|---------------------------------------------------------------------------------------------------------------------------------------------------------------------------------------------------------------------------------------------------------------------------------------------------------------------------------------------|---------------------------------------------------------------------------------------------------------------------------------------------------------------------------------------------------------|
|                                                    |                                      | ATGATGATCGTAGAAGTTGTTATATGCT<br>TTGAC<br><b>R:</b> TCTCGGCATGGACGAGCTGTACAAG<br>TAAAAGCAGTTGTAAGTTAAATTATAAA<br>AAAGC                                                                                                                                                                                                                       | construction of SR <sub>(-)eGFP</sub>                                                                                                                                                                   |
| pCB301-HH-S <sub>(-)mCherry&amp;eGFP</sub> -RZ-NOS | SR <sub>(-)mCherry&amp;eGFP</sub>    | <b>F:</b> CACAGTACCAATAACCATAATGGTGA<br>GCAAGGGCGAGGAGGATAAC<br><b>R:</b> GAAAAGCTGGACACGCAAGATTA<br>AGATCTGTACAGCTCGTCCATGCCGC<br><b>F:</b> GCGGCATGGACGAGCTGTACAGATC<br>TTAATCTTGCCGTGTCCAGCTTTTC<br><b>R:</b> GTTATCCTCCTCGCCCTTGCTCACCA<br>TTATGGTTATTGGTACTGTG                                                                         | To amplify the mCherry for construction of SR <sub>(-)mCherry&amp;eGFP</sub><br>To amplify the pCB301 backbone for construction of SR <sub>(-)mCherry&amp;eGFP</sub>                                    |
| pCB301-T7-S <sub>(-)mCherry&amp;eGFP</sub> -RZ-NOS | T7:SR <sub>(-)mCherry&amp;eGFP</sub> | <b>F:</b> GAAATTAATACGACTCACTATAGGAG<br>AGCAATTGTGCAATTTTATTCAAAC<br><b>R:</b> GGTGGAGATGCCATGCCGACCCAGA<br>GCAATTGTGCATAATTTTATTCTTA<br><b>F:</b> GTTTGAATAAAATTGACACAATTGCT<br>CTCCTATAGTGAGTCGTATTAATTTTC<br><b>R:</b> GAATAAAATTATGACACAATTGCTCT<br>GGGTCGGCATGGCATCTC                                                                  | To amplify the eGFP and mCherry expression cassette for construction of T7:SR <sub>(-)mCherry&amp;eGFP</sub><br>To amplify the pCB301 backbone for construction of T7:SR <sub>(-)mCherry&amp;eGFP</sub> |
| pCB301-HH-S <sub>(+)eGFP</sub> -RZ-NOS             | SR <sub>(+)eGFP</sub>                | <b>F:</b> GGAAAAGCTGGACACGGCAAGATTA<br>CTTGACAGCTCGTCCATGCCGAG<br><b>R:</b> GAACACAGTACCAATAACCATAATG<br>GTGAGCAAGGGCGAGGAGCTGTTC<br><b>F:</b> GAACAGCTCCTCGCCCTGCTCACCA<br>TTATGGTTATTGGTACTGTGTTTC<br><b>R:</b> CTCGGCATGGACGAGCTGTACAAGT<br>AATCTTGCCGTGTCCAGCTTTTCC<br><b>R:</b> GAATAAAATTATGACACAATTGCTCT<br>GAACCCGGGATACCGGGTTTTTCG | To amplify the eGFP for construction of SR <sub>(+)eGFP</sub><br>To amplify the pCB301 backbone for construction of SR <sub>(+)eGFP</sub>                                                               |
| pCB301-HH-M <sub>(-)r</sub> -RZ-NOS                | M <sub>(-)</sub>                     | <b>F:</b> CGAAAACCCGGTATCCCGGGTTCAG<br>AGCAATCAGTGCATCAGAAATATACC<br><b>R:</b> GGTGGAGATGCCATGCCGACCCAGA<br>GCAATCAGTCAAACAAAAAC<br><b>F:</b> GTTTTTGTTTGCACTGATTGCTCTGG<br>GTCGGCATGGCATCTCCACC<br><b>R:</b> GGTATATTCTGATGCACTGATTGCT<br>CTGAACCCGGGATACCGGGTTTTTCG                                                                       | To amplify the TSWV genomic M-RNA sequence for construction of M <sub>(-)</sub><br>To amplify the pCB301 backbone for construction of M <sub>(-)</sub>                                                  |
| pCB301-HH-M <sub>(+)r</sub> -RZ-NOS                | M <sub>(+)</sub>                     | <b>F:</b> CGAAAACCCGGTATCCCGGGTTCAG<br>AGCAATCAGTCAAACAAAACTC<br><b>R:</b> GGTGGAGATGCCATGCCGACCCAGA<br>GCAATCAGTGCCTCAGAAATATAC                                                                                                                                                                                                            | To amplify the TSWV antigenomic M-RNA sequence for construction of M <sub>(+)</sub>                                                                                                                     |

|                                        |                      |                                                                                                                                                                      |                                                                         |
|----------------------------------------|----------------------|----------------------------------------------------------------------------------------------------------------------------------------------------------------------|-------------------------------------------------------------------------|
|                                        |                      | <p><b>F:</b> GTATATTCTGACGCACTGATTGCTC<br/>TGGGTCGGCATGGCATCTCCACC</p> <p><b>R:</b> GAGTTTTTGTTCACCTGATTGCTCT<br/>GAACCCGGGATACCGGGTTTTTCG</p>                       | To amplify the pCB301 backbone for construction of $M_{(-)}$            |
| pCB301-HH- $M_{(-)GFP}$ -RZ-NOS        | $MR_{(-)GFP}$        | <p><b>F:</b> GAATCAAATTTAGCCTGTGACAAGC<br/>AGACTTACTTGTACAGCTCGTCCATGC</p> <p><b>R:</b> CCATTATAATCTGAGCAGACGTATA<br/>AGATGGTGAGCAAGGGCGAGGAGCTG</p>                 | To amplify the eGFP for construction of $MR_{(-)GFP}$                   |
|                                        |                      | <p><b>F:</b> CAGCTCCTCGCCCTTGCTCACCATCT<br/>TATACGTCTGCTCAGATTATAATGG</p> <p><b>R:</b> GCATGGACGAGCTGTACAAGTAAGT<br/>CTGCTTGTACAGGCTAAATTTGATTC</p>                  | To amplify the pCB301 backbone for construction of $MR_{(-)GFP}$        |
| pCB301-HH- $M_{(-)mCherry}$ -RZ-NOS    | $MR_{(-)mCherry}$    | <p><b>F:</b> GAATCAAATTTAGCCTGTGACAAGC<br/>AGACTTAAGATCTGTACAGCTCGTCCAT<br/>GC</p> <p><b>R:</b> CCATTATAATCTGAGCAGACGTATA<br/>AGATGGTGAGCAAGGGCGAGGAGGAT<br/>AAC</p> | To amplify the mCherry for construction of $MR_{(-)mCherry}$            |
|                                        |                      | <p><b>F:</b> GTTATCCTCCTCGCCCTTGCTCACCA<br/>TCTTATACGTCTGCTCAGATTATAATGG</p> <p><b>R:</b> GCATGGACGAGCTGTACAGATCTTA<br/>AGTCTGCTTGTACAGGCTAAATTTGAT<br/>TC</p>       | To amplify the pCB301 backbone for construction of $MR_{(-)mCherry}$    |
| pCB301-HH- $M_{(-)GFP&NSmMut}$ -RZ-NOS | $MR_{(-)GFP&NSmMut}$ | <p><b>F:</b> CTCTACCTTAGGCTGTTGAACTCAA<br/>AATGTAGACTCTTTTCGGTAATAAAGG</p> <p><b>R:</b> GCATGGACGAGCTGTACAAGTAAGT<br/>CTGCTTGTACAGGCTAAATTTGATTC</p>                 | To amplify the $NSm^{Mut}$ for construction of $MR_{(-)GFP&NSmMut}$     |
|                                        |                      | <p><b>F:</b> GAATCAAATTTAGCCTGTGACAAGC<br/>AGACTTACTTGTACAGCTCGTCCATGC</p> <p><b>R:</b> CCTTATTACCGAAAAGAGTCTACAT<br/>TTTGAGTTCAACAGCCTAAGGTAGAG</p>                 | To amplify the pCB301 backbone for construction of $MR_{(-)GFP&NSmMut}$ |
| pCB301-HH- $L_{(-)}$ -RZ-NOS           | $L_{(-)}$            | <p><b>F:</b> CGAAAACCCGGTATCCCGGGTTCAG<br/>AGCAATCAGGTACAATAAAAC</p> <p><b>R:</b> GGTGGAGATGCCATGCCGACCCAGA<br/>GCAATCAGGTAACAACGAT</p>                              | To amplify the TSWV genomic L-RNA for construction of $L_{(-)}$         |
|                                        |                      | <p><b>F:</b> ATCGTTGTTACCTGATTGCTCTGGGT<br/>CGGCATGGCATCTCCACC</p> <p><b>R:</b> GTTTTAGTTGTACCTGATTGCTCTGA<br/>ACCCGGGATACCGGGTTTTTCG</p>                            | To amplify the pCB301 backbone for construction of $L_{(-)}$            |
| pCB301-HH- $L_{(+)}$ -RZ-NOS           | $L_{(+)}$            | <p><b>F:</b> CGAAAACCCGGTATCCCGGGTTCAG<br/>AGCAATCAGGTAACAACGAT</p> <p><b>R:</b> GTGGAGATGCCATGCCGACCCAGAG<br/>CAATCAGGTACAATAAAAC</p>                               | To amplify the TSWV antigenomic L-RNA for construction of $L_{(+)}$     |

|                                       |                     |                                                                                                                                                                                                                                                                                                                     |                                                                                                                                                     |
|---------------------------------------|---------------------|---------------------------------------------------------------------------------------------------------------------------------------------------------------------------------------------------------------------------------------------------------------------------------------------------------------------|-----------------------------------------------------------------------------------------------------------------------------------------------------|
|                                       |                     | <p><b>F:</b> GTTTTAGTTGTACCTGATTGCTCTGG<br/>GTCGGCATGGCATCTCCAC</p> <p><b>R:</b> ATCGTTGTTACCTGATTGCTCTGAAC<br/>CCGGGATACCGGTTTTCG</p>                                                                                                                                                                              | To amplify the pCB301 backbone for construction of L <sub>(-)</sub>                                                                                 |
| pCB301-HH-L <sub>(+)opt</sub> -RZ-NOS | L <sub>(+)opt</sub> | <p><b>F:</b> ATCAGGTAACAACGATTTTAAGCAA<br/>ACATGAACATTCAAGAATCCAAAAGC<br/>TG</p> <p><b>R:</b> CATGCATTGTTAGGCATTACTTTTAA<br/>TCTAATCGGTGCCTCTTCCTCATCAG</p> <p><b>F:</b> CTGATGAGGAAGAGGACACCGATT<br/>AGATTAAGAATGCCTAACAATGCA<br/>TG</p> <p><b>R:</b> CAGCTTTGGATCTTCTGAATGTTCA<br/>TGTTGCTTAAAATCGTTGTACCTGAT</p> | To amplify the RdRp-optimized for construction of L <sub>(+)opt</sub><br><br>To amplify the pCB301 backbone for construction of L <sub>(+)opt</sub> |
| pCB301-HH-M <sub>(-)opt</sub> -RZ-NOS | M <sub>(-)opt</sub> | <p><b>F:</b> ACCATTATAATCTGAGCAGACGTAT<br/>AAGATGAGGATCCTGAAGCTTCTTG</p> <p><b>R:</b> GAATCAAATTTAGCCTGTGACAAGC<br/>AGACCTAAACAAGATGAGAGAAATC</p> <p><b>F:</b> GATTTCTCTCATCTTGTAGGCTG<br/>CTTGTCACAGGCTAAATTTGATTC</p> <p><b>R:</b> CAAGAAGCTTCAGGATCCTCATCTT<br/>ATACGTCTGCTCAGATTATAATGGT</p>                    | To amplify the GP-optimized for construction of M <sub>(-)opt</sub><br><br>To amplify the pCB301 backbone for construction of M <sub>(-)opt</sub>   |
| pGEM-NSs                              | -                   | <p><b>F:</b> GTTAATACTAACGGAGTGAAAC</p> <p><b>R:</b> GATTGAAATTTGGCTTGAAACAGTA<br/>C</p>                                                                                                                                                                                                                            | To amplify the sense-NSs for construction of pGEM-NSs to generate the DIG-labeled probes of S agRNA in Northern blot                                |
| pGEM-anti-NSs                         | -                   | <p><b>F:</b> GATTGAAATTTGGCTTGAAACAGTA<br/>C</p> <p><b>R:</b> GTTAATACTAACGGAGTGAAAC</p>                                                                                                                                                                                                                            | To amplify the antisense-NSs for construction of pGEM-anti-NSs to generate the DIG-labeled probes of S gRNA in Northern blot                        |
| pGEM-NSm                              | -                   | <p><b>F:</b> GCTTTGACTAAAGCTATGGATAC</p> <p><b>R:</b> TCTTGATTCTTGGCTGCACATC</p>                                                                                                                                                                                                                                    | To amplify the sense-NSm for construction of pGEM-NSm to generate the DIG-labeled probes of M agRNA in Northern blot                                |
| pGEM-anti-NSm                         | -                   | <p><b>F:</b> TCTTGATTCTTGGCTGCACATC</p> <p><b>R:</b> GCTTTGACTAAAGCTATGGATAC</p>                                                                                                                                                                                                                                    | To amplify the antisense-NSm for construction of pGEM-anti-NSm to generate the DIG-labeled probes of M gRNA in Northern blot                        |
| pGEM-L 5' UTR                         | -                   | <p><b>F:</b> AGAGCAATCAGGTACAACATAAAC</p> <p><b>R:</b> AAGTAATGCCTAACAATGCATGA</p>                                                                                                                                                                                                                                  | To amplify the L 5' UTR for construction of pGEM-L 5' UTR to generate the DIG-labeled probes of L agRNA in Northern blot                            |
| pGEM-anti-L 5' UTR                    | -                   | <p><b>F:</b> AAGTAATGCCTAACAATGCATGA</p>                                                                                                                                                                                                                                                                            | To amplify the antisense-L 5'UTR for                                                                                                                |

|                |   |                                                                                                                                 |                                                                                                                                        |
|----------------|---|---------------------------------------------------------------------------------------------------------------------------------|----------------------------------------------------------------------------------------------------------------------------------------|
|                |   | <b>R: AGAGCAATCAGGTACAACATAAAAC</b>                                                                                             | construction of pGEM-anti-L 5'UTR to generate the DIG-labeled probes of L gRNA in Northern blot                                        |
| pGEM-eGFP      | - | <b>F: ATGGTGAGCAAGGGCGAGGAGCTGTTC</b><br><b>R: TTACTTGTACAGCTCGTCCATGCCGAGA</b>                                                 | To amplify the sense-eGFP for construction of pGEM-eGFP to generate the DIG-labeled probes of antisense-eGFP RNA in Northern blot      |
| pGEM-anti-eGFP | - | <b>F: TTACTTGTACAGCTCGTCCATGCCGAGA</b><br><b>R: ATGGTGAGCAAGGGCGAGGAGCTGTTC</b>                                                 | To amplify the antisense-eGFP for construction of pGEM-anti-eGFP to generate the DIG-labeled probes of sense-eGFP RNA in Northern blot |
| -              | - | <b>F: GGTGGAGATGCCATGCCGACCCAGAGCAATTGTGTCATAATTTTATTCTTA</b><br><b>R: GGTGGAGATGCCATGCCGACCCAGAGCAATTGTGTCATAATTTTATTCAAAC</b> | To amplify the of $S_{(+)\text{eGFP}}$ minigenome by RT-PCR                                                                            |
| -              | - | <b>F: GTTCATTTCAATTTGGAGAGGAGAGCATCAGTGCAAACAAAAAC</b><br><b>R: GGTGGAGATGCCATGCCGACCCAGAGCAATCAGTGCGTCAGAAATATAC</b>           | To amplify the of $M_{(-)\text{mCherry}}$ and $M_{(-)\text{eGFP}}$ minigenome by RT-PCR                                                |
| -              | - | <b>F: GAATCAAATTTAGCCTGTGACAAGCAGACCTAAACAAGATGAGAGAAATC</b><br><b>R: GGTGGAGATGCCATGCCGACCCAGAGCAATCAGTGCAAACAAAAAC</b>        | To amplify the of $M_{(-)\text{opt}}$ genomic RNA by RT-PCR                                                                            |
| -              | - | <b>F: GATCAAGGATGTTAATTCAGCATGCTTATCCCGATCCTCGAC</b><br><b>R: GAATCAAATTTAGCCTGTGACAAGCAGACCTAAACAAGATGAGAGAAATC</b>            | To amplify the of $L_{(+)\text{opt}}$ antigenomic RNA by RT-PCR                                                                        |

## References

1. Fang XD, *et al.* (2019) A cytorhabdovirus phosphoprotein forms mobile inclusions trafficking on the actin/ER network for viral RNA synthesis. *J Exp Bot* 70(15): 4049-4062.
2. Herold J & Andino R (2000) Poliovirus requires a precise 5' end for efficient positive-strand RNA synthesis. *J Virol* 74(14):6394-6400.
3. Shen Y, *et al.* (2014) A versatile complementation assay for cell-to-cell and long distance movements by cucumber mosaic virus based agro-infiltration. *Virus Res* 190:25-33.
4. Jiang L, *et al.* (2017) Occurrence and diversity of tomato spotted wilt virus isolates breaking the Tsw resistance gene of *Capsicum chinense* in Yunnan, southwest China. *Plant Pathol* 66(6):980-989.
5. Voinnet O & Baulcombe DC (1997) Systemic signalling in gene silencing. *Nature* 389(6651):553.
6. Wang Q, *et al.* (2015) Rescue of a plant negative-strand RNA virus from cloned cDNA: insights into enveloped plant virus movement and morphogenesis. *PLoS Pathog* 11(10):e1005223.
7. Ganesan U, *et al.* (2013) Construction of a sonchus yellow net virus minireplicon: a step toward reverse genetic analysis of plant negative-strand RNA viruses. *J Virol* 87(19):10598-10611.
8. Li J, *et al.* (2019) A plant immune receptor adopts a two-step recognition mechanism to enhance viral effector perception. *Mol Plant* 12(2):248-262.
9. Feng MF, *et al.* (2018) Identification of strawberry vein banding virus encoded P6 as an RNA silencing suppressor. *Virology* 520:103-110.
10. Kong L, Wu J, Lu L, Xu Y, & Zhou X (2014) Interaction between rice stripe virus disease-specific protein and host PsbP enhances virus symptoms. *Mol Plant* 7(4):691-708.
